# Supplementary material for: Integration of Transcriptome and Exome Genotyping Identifies Significant Variants with Autism Spectrum Disorder
Source: MDPI journal article supplement (doi:10.3390/ph15020158), 2022-01-27
Supplement: s1 [file s1]

# Integration of Transcriptome and Exome Genotyping Identifies Significant Variants with Autism Spectrum Disorder

Noor B. Almandil <sup>1</sup>, Abdulla AlSulaiman <sup>2</sup>, Sumayh A. Aldakeel <sup>3</sup>, Deem N. Alkuroud <sup>3</sup>, Halah Egal Aljofi <sup>4</sup>, Safah Alzahrani <sup>5,6</sup>, Aishah Al-mana <sup>5,6</sup>, Asma A Alfuraih <sup>3</sup>, Majed Alabdali <sup>2</sup>, Fahd A. Alkhamis <sup>2</sup>, Sayed AbdulAzeez <sup>3</sup> and J. Francis Borgio <sup>3,\*</sup>

**Citation:** Almandil, N.B.; AlSulaiman, A.; Aldakeel, S.A.; Alkuroud, D.N.; Aljofi, H.E.; Alzahrani, S.; Al-mana, A.; Alfuraih, A.A.; Alabdali, M.; Alkhamis, F.A.; et al. Integration of Transcriptome and Exome Genotyping Identifies Significant Variants with Autism Spectrum Disorder. *Pharmaceuticals* **2022**, *15*, 158.  
<https://doi.org/10.3390/ph15020158>

Academic Editor: Cinzia Ciccacci

Received: 6 December 2021

Accepted: 25 January 2022

Published: 27 January 2022

**Publisher's Note:** MDPI stays neutral with regard to jurisdictional claims in published maps and institutional affiliations.

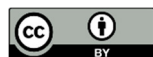

**Copyright:** © 2022 by the authors. Licensee MDPI, Basel, Switzerland. This article is an open access article distributed under the terms and conditions of the Creative Commons Attribution (CC BY) license (<https://creativecommons.org/licenses/by/4.0/>).

<sup>1</sup> Department of Clinical Pharmacy Research, Institute for Research and Medical Consultations (IRMC), Imam Abdulrahman Bin Faisal University, Dammam 31441, Saudi Arabia; nbalmandil@iau.edu.sa

<sup>2</sup> Department of Neurology, College of Medicine, Imam Abdulrahman Bin Faisal University, Dammam 31441, Saudi Arabia; aalsulaiman@iau.edu.sa (A.AlSulaiman.); mmalabdali@iau.edu.sa (M.A.); fkhamsis@iau.edu.sa (F.A.A.)

<sup>3</sup> Department of Genetic Research, Institute for Research and Medical Consultations (IRMC), Imam Abdulrahman Bin Faisal University, Dammam 31441, Saudi Arabia; sumayh1427@gmail.com (S.A.A.); dalkroud@gmail.com (D.N.A.); asmaalfuraih95@gmail.com (A.A.A.); asayed@iau.edu.sa (S.AbdulAzeez.)

<sup>4</sup> Environmental Health Research Area, Institute for Research and Medical Consultations (IRMC), Imam Abdulrahman Bin Faisal University, Dammam 31441, Saudi Arabia; healjofi@iau.edu.sa

<sup>5</sup> Department of Mental Health, College of Medicine, Imam Abdulrahman Bin Faisal University, Dammam 31441, Saudi Arabia; sialzhrani@iau.edu.sa (S.Alzahrani.); amalmana@iau.edu.sa (A.Almana.)

<sup>6</sup> King Fahad Hospital of the University, Imam Abdulrahman Bin Faisal University, Dammam 34212, Saudi Arabia

Correspondence: fbalexander@iau.edu.sa; Tel.: +966-13-3330864

\*

**Table S1.** List of significant SNPs at  $p < 0.001$ .

| S.No. | CHR      | SNP             | BP              | A1       | F_A           | F_U           | A2       | CHISQ        | P               | OR           | SE            | L95          | U95          |
|-------|----------|-----------------|-----------------|----------|---------------|---------------|----------|--------------|-----------------|--------------|---------------|--------------|--------------|
| 1     | 1        | exm10307        | 6705944         | T        | 0.08462       | 0.005682      | C        | 12.36        | 0.0004376       | 16.18        | 1.051         | 2.061        | 127          |
| 2     | 1        | exm2259679      | 11029478        | T        | 0.3154        | 0.5057        | G        | 11.08        | 0.0008721       | 0.4503       | 0.2416        | 0.2805       | 0.723        |
| 3     | 1        | exm2264801      | 11938050        | A        | 0.3154        | 0.5244        | G        | 12.91        | 0.0003268       | 0.4178       | 0.2451        | 0.2584       | 0.6755       |
| 4     | 1        | exm2250514      | 20717763        | A        | 0.5923        | 0.3523        | C        | 17.38        | 3.06E-05        | 2.671        | 0.2382        | 1.675        | 4.261        |
| 5     | 1        | exm27957        | 21795388        | A        | 0.3308        | 0.5227        | G        | 11.18        | 0.0008289       | 0.4513       | 0.2398        | 0.282        | 0.7221       |
| 6     | 1        | exm2268870      | 23198619        | G        | 0.1231        | 0.3182        | T        | 15.82        | 6.97E-05        | 0.3008       | 0.3122        | 0.1631       | 0.5546       |
| 7     | 1        | exm39585        | 32149721        | C        | 0.1308        | 0.02841       | G        | 11.74        | 0.0006114       | 5.145        | 0.523         | 1.846        | 14.34        |
| 8     | 1        | exm2265001      | 37254301        | G        | 0.4615        | 0.267         | A        | 12.44        | 0.0004207       | 2.353        | 0.2449        | 1.456        | 3.802        |
| 9     | 1        | exm2264831      | 45460832        | G        | 0.3           | 0.4943        | A        | 11.66        | 0.0006398       | 0.4384       | 0.2436        | 0.272        | 0.7068       |
| 10    | 1        | exm2264832      | 47309265        | G        | 0.2462        | 0.4318        | A        | 11.29        | 0.0007809       | 0.4296       | 0.2542        | 0.2611       | 0.7071       |
| 11    | 1        | exm59762        | 53320274        | G        | 0.2308        | 0.4602        | T        | 17.03        | 3.68E-05        | 0.3519       | 0.2573        | 0.2125       | 0.5826       |
| 12    | 1        | exm61147        | 54605320        | G        | 0.2769        | 0.4773        | C        | 12.59        | 0.0003876       | 0.4195       | 0.2474        | 0.2583       | 0.6811       |
| 13    | <b>1</b> | <b>exm65641</b> | <b>63999868</b> | <b>C</b> | <b>0.3952</b> | <b>0.2151</b> | <b>T</b> | <b>11.33</b> | <b>0.000762</b> | <b>2.384</b> | <b>0.2611</b> | <b>1.429</b> | <b>3.977</b> |
| 14    | 1        | exm-rs6700896   | 66089782        | T        | 0.2538        | 0.4659        | C        | 14.33        | 0.0001531       | 0.39         | 0.2519        | 0.238        | 0.6389       |
| 15    | 1        | exm-rs1892534   | 66105944        | A        | 0.2385        | 0.4659        | G        | 16.61        | 4.60E-05        | 0.359        | 0.2553        | 0.2176       | 0.5921       |
| 16    | 1        | exm-rs4420065   | 66161461        | T        | 0.2308        | 0.4602        | C        | 17.03        | 3.68E-05        | 0.3519       | 0.2573        | 0.2125       | 0.5826       |
| 17    | 1        | exm-rs12753193  | 66169679        | G        | 0.2385        | 0.4483        | A        | 14.24        | 0.0001607       | 0.3854       | 0.2561        | 0.2333       | 0.6367       |
| 18    | 1        | exm69632        | 77685042        | C        | 0.3308        | 0.1534        | T        | 13.33        | 0.000261        | 2.728        | 0.2802        | 1.575        | 4.723        |
| 19    | 1        | exm2268717      | 85213900        | T        | 0.2077        | 0.4375        | C        | 17.6         | 2.73E-05        | 0.337        | 0.2643        | 0.2008       | 0.5657       |
| 20    | 1        | exm2268726      | 95276691        | C        | 0.3231        | 0.5284        | T        | 12.79        | 0.0003491       | 0.426        | 0.2408        | 0.2657       | 0.6828       |
| 21    | 1        | exm2264886      | 108088171       | A        | 0.2538        | 0.4489        | G        | 12.25        | 0.0004641       | 0.4177       | 0.2522        | 0.2548       | 0.6847       |
| 22    | 1        | exm-rs1933182   | 109999838       | T        | 0.2308        | 0.4302        | G        | 13.05        | 0.0003038       | 0.3973       | 0.2589        | 0.2392       | 0.66         |
| 23    | 1        | exm2268738      | 111369934       | T        | 0.3254        | 0.5345        | C        | 12.93        | 0.000324        | 0.4201       | 0.2434        | 0.2607       | 0.677        |
| 24    | 1        | exm83649        | 111957097       | G        | 0.2923        | 0.4943        | C        | 12.63        | 0.00038         | 0.4225       | 0.2448        | 0.2615       | 0.6827       |
| 25    | 1        | exm83663        | 111957370       | C        | 0             | 0.1364        | G        | 19.24        | 1.16E-05        | 0            | inf           | 0            | nan          |
| 26    | 1        | exm83704        | 111957693       | G        | 0.2923        | 0.5057        | A        | 14.02        | 0.0001807       | 0.4038       | 0.2448        | 0.2499       | 0.6523       |
| 27    | 1        | exm2264891      | 112385547       | A        | 0.2692        | 0.4773        | G        | 13.62        | 0.0002241       | 0.4035       | 0.2487        | 0.2478       | 0.657        |

|    |   |                |           |   |          |         |   |       |           |         |        |         |        |
|----|---|----------------|-----------|---|----------|---------|---|-------|-----------|---------|--------|---------|--------|
| 28 | 1 | exm87717       | 117576522 | T | 0.01538  | 0.1307  | A | 13.25 | 0.0002728 | 0.1039  | 0.7469 | 0.02405 | 0.4493 |
| 29 | 1 | exm2259802     | 150163390 | C | 0.07692  | 0.2159  | T | 10.92 | 0.0009509 | 0.3026  | 0.3767 | 0.1446  | 0.6332 |
| 30 | 1 | exm95472       | 150940625 | G | 0.2462   | 0.09091 | T | 13.63 | 0.0002231 | 3.265   | 0.332  | 1.704   | 6.259  |
| 31 | 1 | exm-rs267734   | 150951477 | G | 0.2462   | 0.08523 | A | 14.89 | 0.0001137 | 3.505   | 0.3381 | 1.807   | 6.799  |
| 32 | 1 | exm95523       | 150958836 | G | 0.2769   | 0.08046 | A | 20.9  | 4.84E-06  | 4.377   | 0.3407 | 2.245   | 8.535  |
| 33 | 1 | exm95850       | 151089888 | C | 0.05385  | 0.1818  | A | 11.01 | 0.0009057 | 0.2561  | 0.435  | 0.1092  | 0.6007 |
| 34 | 1 | exm97215       | 151512895 | G | 0.1231   | 0.02273 | A | 12.33 | 0.0004468 | 6.035   | 0.5719 | 1.967   | 18.51  |
| 35 | 1 | exm103508      | 153954646 | T | 0.07692  | 0       | C | 14    | 0.0001832 | NA      | NA     | NA      | NA     |
| 36 | 1 | exm109473      | 156551248 | A | 0.06923  | 0       | G | 12.55 | 0.0003954 | NA      | NA     | NA      | NA     |
| 37 | 1 | exm111298      | 157062739 | G | 0.1077   | 0.2784  | C | 13.33 | 0.0002614 | 0.3128  | 0.3291 | 0.1641  | 0.5963 |
| 38 | 1 | exm112941      | 158576394 | A | 0        | 0.09091 | C | 12.47 | 0.0004135 | 0       | inf    | 0       | nan    |
| 39 | 1 | exm113021      | 158587368 | C | 0        | 0.125   | T | 17.51 | 2.86E-05  | 0       | inf    | 0       | nan    |
| 40 | 1 | exm113223      | 158623092 | A | 0        | 0.09091 | T | 12.47 | 0.0004135 | 0       | inf    | 0       | nan    |
| 41 | 1 | exm113224      | 158623103 | A | 0        | 0.09091 | G | 12.47 | 0.0004135 | 0       | inf    | 0       | nan    |
| 42 | 1 | exm113458      | 158669980 | A | 0.007692 | 0.1307  | G | 15.65 | 7.63E-05  | 0.05157 | 1.028  | 0.00687 | 0.3871 |
| 43 | 1 | exm113678      | 158746678 | C | 0.06923  | 0.2045  | T | 10.91 | 0.000954  | 0.2893  | 0.3928 | 0.1339  | 0.6247 |
| 44 | 1 | exm2259837     | 164733504 | G | 0.03077  | 0.1761  | A | 15.6  | 7.83E-05  | 0.1485  | 0.5451 | 0.05102 | 0.4322 |
| 45 | 1 | exm121603      | 169391154 | A | 0.2846   | 0.4716  | G | 10.97 | 0.0009279 | 0.4458  | 0.2461 | 0.2752  | 0.7222 |
| 46 | 1 | exm-rs17346452 | 172053287 | C | 0.2231   | 0.07955 | T | 12.75 | 0.0003552 | 3.322   | 0.3493 | 1.676   | 6.588  |
| 47 | 1 | exm2265060     | 178518008 | A | 0.1231   | 0.2898  | G | 12.15 | 0.000491  | 0.344   | 0.3145 | 0.1857  | 0.6371 |
| 48 | 1 | exm129362      | 182640864 | C | 0.07692  | 0.2216  | T | 11.64 | 0.000647  | 0.2927  | 0.3759 | 0.1401  | 0.6115 |
| 49 | 1 | exm131467      | 186026474 | T | 0.5      | 0.3068  | C | 11.74 | 0.0006112 | 2.259   | 0.2398 | 1.412   | 3.615  |
| 50 | 1 | exm2264936     | 190551418 | G | 0.3692   | 0.5625  | A | 11.19 | 0.0008229 | 0.4553  | 0.2369 | 0.2862  | 0.7243 |
| 51 | 1 | exm2268805     | 195738953 | G | 0.6462   | 0.3678  | T | 23.07 | 1.56E-06  | 3.139   | 0.2416 | 1.955   | 5.039  |
| 52 | 1 | exm134032      | 197070442 | T | 0.3385   | 0.5284  | G | 10.91 | 0.0009563 | 0.4566  | 0.2391 | 0.2858  | 0.7295 |
| 53 | 1 | exm134043      | 197070697 | C | 0.3385   | 0.5284  | T | 10.91 | 0.0009563 | 0.4566  | 0.2391 | 0.2858  | 0.7295 |
| 54 | 1 | exm-rs2786098  | 197325908 | A | 0.1077   | 0.2727  | C | 12.61 | 0.0003847 | 0.3218  | 0.3297 | 0.1687  | 0.6141 |
| 55 | 1 | exm2265070     | 197359999 | G | 0.2923   | 0.5115  | A | 14.7  | 0.0001263 | 0.3945  | 0.2453 | 0.2439  | 0.638  |
| 56 | 1 | exm2268809     | 198634625 | C | 0.2615   | 0.4655  | T | 13.16 | 0.0002854 | 0.4066  | 0.2509 | 0.2487  | 0.6649 |
| 57 | 1 | exm2250517     | 207535246 | A | 0.3231   | 0.5795  | C | 19.74 | 8.87E-06  | 0.3463  | 0.2418 | 0.2155  | 0.5562 |
| 58 | 1 | exm151013      | 222802376 | G | 0.3231   | 0.1591  | A | 11.4  | 0.0007357 | 2.523   | 0.2786 | 1.461   | 4.356  |

|    |   |                |           |   |         |          |   |       |           |        |        |         |        |
|----|---|----------------|-----------|---|---------|----------|---|-------|-----------|--------|--------|---------|--------|
| 59 | 1 | exm151047      | 222803204 | G | 0.3231  | 0.1591   | A | 11.4  | 0.0007357 | 2.523  | 0.2786 | 1.461   | 4.356  |
| 60 | 1 | exm2260036     | 231326086 | A | 0.3538  | 0.5682   | G | 13.77 | 0.0002068 | 0.4162 | 0.2383 | 0.2609  | 0.664  |
| 61 | 1 | exm159168      | 232568041 | A | 0.1154  | 0.01705  | G | 13.06 | 0.0003016 | 7.522  | 0.6438 | 2.13    | 26.57  |
| 62 | 1 | exm2260055     | 239144913 | G | 0.2538  | 0.09659  | A | 13.53 | 0.0002352 | 3.182  | 0.3252 | 1.682   | 6.018  |
| 63 | 1 | exm163482      | 240492734 | A | 0.3154  | 0.1534   | G | 11.35 | 0.0007545 | 2.542  | 0.2817 | 1.464   | 4.416  |
| 64 | 1 | exm164066      | 242035382 | T | 0       | 0.1176   | C | 16.39 | 5.17E-05  | 0      | inf    | 0       | nan    |
| 65 | 1 | exm168221      | 248569674 | G | 0       | 0.09659  | A | 13.3  | 0.0002661 | 0      | inf    | 0       | nan    |
| 66 | 2 | exm2269013     | 4905977   | T | 0.5635  | 0.3563   | C | 12.71 | 0.0003638 | 2.332  | 0.2394 | 1.459   | 3.728  |
| 67 | 2 | exm-rs6431805  | 6654714   | C | 0.08594 | 0.2443   | T | 12.73 | 0.0003607 | 0.2908 | 0.3609 | 0.1434  | 0.5899 |
| 68 | 2 | exm-rs6741819  | 7147973   | T | 0.2     | 0.4602   | C | 22.27 | 2.37E-06  | 0.2932 | 0.2664 | 0.174   | 0.4942 |
| 69 | 2 | exm2254476     | 11500314  | C | 0.3846  | 0.5795   | A | 11.37 | 0.0007484 | 0.4534 | 0.2363 | 0.2854  | 0.7205 |
| 70 | 2 | exm174940      | 20173436  | G | 0.1     | 0.005682 | A | 15.24 | 9.49E-05  | 19.44  | 1.045  | 2.51    | 150.6  |
| 71 | 2 | exm-rs2082871  | 20712300  | G | 0.1     | 0.3011   | A | 17.88 | 2.35E-05  | 0.2579 | 0.3354 | 0.1336  | 0.4976 |
| 72 | 2 | exm179384      | 27260469  | A | 0.3692  | 0.1882   | G | 12.34 | 0.0004432 | 2.524  | 0.2674 | 1.495   | 4.264  |
| 73 | 2 | exm2261254     | 32495471  | A | 0.4462  | 0.2414   | C | 14.13 | 0.0001702 | 2.532  | 0.25   | 1.551   | 4.133  |
| 74 | 2 | exm2261261     | 37603801  | G | 0.6154  | 0.3466   | A | 21.74 | 3.12E-06  | 3.016  | 0.24   | 1.885   | 4.828  |
| 75 | 2 | exm2265315     | 42180912  | G | 0.03846 | 0.1648   | A | 12.08 | 0.0005101 | 0.2028 | 0.4993 | 0.07621 | 0.5395 |
| 76 | 2 | exm-rs13429458 | 43638838  | C | 0.1538  | 0.3409   | A | 13.55 | 0.0002322 | 0.3515 | 0.2905 | 0.1989  | 0.6212 |
| 77 | 2 | exm190111      | 44021676  | T | 0       | 0.08046  | C | 10.96 | 0.0009286 | 0      | inf    | 0       | nan    |
| 78 | 2 | exm190359      | 44099244  | T | 0       | 0.07955  | C | 10.84 | 0.0009951 | 0      | inf    | 0       | nan    |
| 79 | 2 | exm195691      | 58316814  | G | 0.5846  | 0.3908   | A | 11.21 | 0.0008132 | 2.194  | 0.2363 | 1.381   | 3.486  |
| 80 | 2 | exm2265168     | 86135154  | G | 0.4615  | 0.2727   | A | 11.67 | 0.0006345 | 2.286  | 0.2441 | 1.417   | 3.688  |
| 81 | 2 | exm217591      | 102955468 | A | 0.5938  | 0.3807   | C | 13.5  | 0.000238  | 2.378  | 0.2377 | 1.492   | 3.789  |
| 82 | 2 | exm-rs17483466 | 111797458 | G | 0.2077  | 0.07386  | A | 11.79 | 0.0005971 | 3.287  | 0.3603 | 1.622   | 6.66   |
| 83 | 2 | exm221863      | 113539192 | A | 0.06154 | 0        | T | 11.12 | 0.0008533 | NA     | NA     | NA      | NA     |
| 84 | 2 | exm2254482     | 115848781 | T | 0.3308  | 0.5284   | C | 11.83 | 0.0005832 | 0.4411 | 0.2399 | 0.2756  | 0.7059 |
| 85 | 2 | exm2269311     | 120986872 | T | 0.1538  | 0.3864   | C | 19.73 | 8.91E-06  | 0.2888 | 0.2882 | 0.1641  | 0.508  |
| 86 | 2 | exm-rs13420028 | 133188106 | G | 0.1077  | 0.267    | T | 11.9  | 0.0005625 | 0.3313 | 0.3303 | 0.1734  | 0.6328 |
| 87 | 2 | exm-rs7567288  | 134434824 | C | 0.1538  | 0.3239   | T | 11.48 | 0.0007045 | 0.3796 | 0.2916 | 0.2143  | 0.6723 |
| 88 | 2 | exm2269143     | 142707328 | T | 0.3492  | 0.5714   | G | 14.25 | 0.0001597 | 0.4024 | 0.2434 | 0.2498  | 0.6484 |
| 89 | 2 | exm2263953     | 144092133 | A | 0.06154 | 0.2069   | C | 12.7  | 0.0003656 | 0.2514 | 0.4101 | 0.1125  | 0.5616 |

|     |   |                |           |   |         |         |   |       |           |        |        |         |        |
|-----|---|----------------|-----------|---|---------|---------|---|-------|-----------|--------|--------|---------|--------|
| 90  | 2 | exm232550      | 152322095 | A | 0.1538  | 0.3295  | T | 12.15 | 0.0004901 | 0.3699 | 0.2912 | 0.209   | 0.6546 |
| 91  | 2 | exm232595      | 152331418 | C | 0.1538  | 0.3295  | G | 12.15 | 0.0004901 | 0.3699 | 0.2912 | 0.209   | 0.6546 |
| 92  | 2 | exm2265220     | 153891830 | G | 0.1328  | 0.3182  | A | 13.96 | 0.0001872 | 0.3282 | 0.3066 | 0.1799  | 0.5986 |
| 93  | 2 | exm-rs10189160 | 157012321 | G | 0.5077  | 0.3059  | A | 12.57 | 0.0003913 | 2.34   | 0.2418 | 1.457   | 3.759  |
| 94  | 2 | exm234189      | 157425931 | C | 0       | 0.07955 | A | 10.84 | 0.0009951 | 0      | inf    | 0       | nan    |
| 95  | 2 | exm234888      | 159663599 | C | 0.3231  | 0.5455  | T | 14.93 | 0.0001113 | 0.3977 | 0.241  | 0.248   | 0.6379 |
| 96  | 2 | exm235173      | 160086654 | G | 0.5154  | 0.3182  | A | 12.1  | 0.0005053 | 2.279  | 0.2387 | 1.427   | 3.639  |
| 97  | 2 | exm239782      | 169824983 | C | 0.1077  | 0.01705 | T | 11.71 | 0.0006218 | 6.96   | 0.6474 | 1.957   | 24.76  |
| 98  | 2 | exm249736      | 179914640 | A | 0.2538  | 0.08523 | G | 16.07 | 6.09E-05  | 3.652  | 0.3369 | 1.887   | 7.067  |
| 99  | 2 | exm252043      | 189864080 | A | 0.2266  | 0.4091  | G | 11.13 | 0.0008501 | 0.4231 | 0.2609 | 0.2537  | 0.7056 |
| 100 | 2 | exm2269194     | 192458747 | C | 0.4846  | 0.2727  | T | 14.52 | 0.0001385 | 2.507  | 0.2438 | 1.555   | 4.044  |
| 101 | 2 | exm259986      | 207603234 | G | 0.1562  | 0.3409  | T | 13.03 | 0.0003063 | 0.358  | 0.2908 | 0.2025  | 0.633  |
| 102 | 2 | exm2261158     | 208014898 | T | 0.1111  | 0.2917  | C | 13.94 | 0.0001886 | 0.3036 | 0.3304 | 0.1589  | 0.5801 |
| 103 | 2 | exm2265268     | 212807645 | A | 0.2937  | 0.5123  | G | 13.95 | 0.0001881 | 0.3957 | 0.2509 | 0.242   | 0.6471 |
| 104 | 2 | exm-rs7590720  | 216898658 | G | 0.4692  | 0.2784  | A | 11.82 | 0.0005846 | 2.291  | 0.2432 | 1.422   | 3.691  |
| 105 | 2 | exm-rs16864755 | 224274622 | A | 0.1846  | 0.05114 | G | 13.85 | 0.0001984 | 4.201  | 0.4101 | 1.881   | 9.386  |
| 106 | 2 | exm272457      | 228493211 | A | 0.2077  | 0.3977  | G | 12.47 | 0.0004132 | 0.3969 | 0.2655 | 0.2359  | 0.6679 |
| 107 | 2 | exm278071      | 235950002 | A | 0.2077  | 0.07386 | G | 11.79 | 0.0005971 | 3.287  | 0.3603 | 1.622   | 6.66   |
| 108 | 2 | exm278779      | 238244963 | A | 0.1385  | 0.3125  | G | 12.47 | 0.000414  | 0.3536 | 0.3015 | 0.1958  | 0.6385 |
| 109 | 2 | exm278798      | 238247734 | G | 0.06923 | 0.2273  | C | 13.89 | 0.0001942 | 0.2529 | 0.3895 | 0.1179  | 0.5426 |
| 110 | 3 | exm-rs2727943  | 1897973   | T | 0.03846 | 0.2184  | C | 19.84 | 8.44E-06  | 0.1432 | 0.4916 | 0.05462 | 0.3752 |
| 111 | 3 | exm-rs6772112  | 11641535  | C | 0.04688 | 0.1818  | T | 12.34 | 0.0004439 | 0.2213 | 0.4616 | 0.08956 | 0.5469 |
| 112 | 3 | exm291396      | 12875443  | G | 0.3615  | 0.5625  | A | 12.1  | 0.0005031 | 0.4404 | 0.2375 | 0.2765  | 0.7015 |
| 113 | 3 | exm292458      | 14187449  | G | 0.6     | 0.3693  | T | 15.98 | 6.39E-05  | 2.562  | 0.2376 | 1.608   | 4.081  |
| 114 | 3 | exm2269605     | 16237372  | T | 0       | 0.125   | C | 17.51 | 2.86E-05  | 0      | inf    | 0       | nan    |
| 115 | 3 | exm294619      | 17053499  | A | 0.4615  | 0.2273  | G | 18.65 | 1.57E-05  | 2.914  | 0.2516 | 1.78    | 4.772  |
| 116 | 3 | exm-rs17272796 | 17077268  | C | 0.4615  | 0.233   | T | 17.67 | 2.63E-05  | 2.822  | 0.2505 | 1.727   | 4.611  |
| 117 | 3 | exm2261480     | 27614316  | C | 0.5     | 0.25    | A | 20.38 | 6.36E-06  | 3      | 0.2471 | 1.848   | 4.869  |
| 118 | 3 | exm2269421     | 27615419  | T | 0.6     | 0.3807  | C | 14.43 | 0.0001458 | 2.44   | 0.237  | 1.534   | 3.883  |
| 119 | 3 | exm299494      | 37574951  | A | 0.5154  | 0.3125  | G | 12.84 | 0.0003396 | 2.34   | 0.2393 | 1.464   | 3.74   |
| 120 | 3 | exm302016      | 39161456  | A | 0.4538  | 0.2443  | G | 14.77 | 0.0001213 | 2.57   | 0.2486 | 1.579   | 4.184  |

|     |   |                |           |   |         |          |   |       |           |        |        |         |        |
|-----|---|----------------|-----------|---|---------|----------|---|-------|-----------|--------|--------|---------|--------|
| 121 | 3 | exm302017      | 39161464  | A | 0.4538  | 0.2443   | G | 14.77 | 0.0001213 | 2.57   | 0.2486 | 1.579   | 4.184  |
| 122 | 3 | exm302175      | 39180263  | G | 0.4453  | 0.2616   | A | 11.03 | 0.0008945 | 2.266  | 0.2484 | 1.392   | 3.687  |
| 123 | 3 | exm2256022     | 42131415  | A | 0.4154  | 0.233    | G | 11.62 | 0.000651  | 2.34   | 0.2519 | 1.428   | 3.833  |
| 124 | 3 | exm-rs4682869  | 42923964  | C | 0.4844  | 0.2931   | T | 11.52 | 0.0006878 | 2.266  | 0.2429 | 1.407   | 3.647  |
| 125 | 3 | exm324348      | 53899276  | T | 0.06154 | 0.1989   | C | 11.67 | 0.0006335 | 0.2642 | 0.4109 | 0.1181  | 0.5911 |
| 126 | 3 | exm2265460     | 64171993  | A | 0.3154  | 0.5227   | G | 13.08 | 0.0002982 | 0.4206 | 0.2417 | 0.2619  | 0.6754 |
| 127 | 3 | exm330361      | 74334560  | T | 0.08462 | 0.2557   | C | 14.63 | 0.0001305 | 0.2691 | 0.3594 | 0.133   | 0.5443 |
| 128 | 3 | exm334983      | 102157365 | T | 0.3154  | 0.1534   | A | 11.35 | 0.0007545 | 2.542  | 0.2817 | 1.464   | 4.416  |
| 129 | 3 | exm334985      | 102157417 | G | 0.3154  | 0.1534   | A | 11.35 | 0.0007545 | 2.542  | 0.2817 | 1.464   | 4.416  |
| 130 | 3 | exm2269497     | 102240202 | T | 0.5968  | 0.3916   | C | 11.98 | 0.0005388 | 2.3    | 0.2425 | 1.43    | 3.699  |
| 131 | 3 | exm2265485     | 104640080 | G | 0.2231  | 0.4148   | A | 12.36 | 0.0004376 | 0.4051 | 0.2604 | 0.2432  | 0.6749 |
| 132 | 3 | exm-rs10433406 | 124192674 | A | 0.02308 | 0.1307   | C | 11.14 | 0.0008469 | 0.1571 | 0.6255 | 0.04612 | 0.5354 |
| 133 | 3 | exm2265501     | 125867617 | G | 0.3     | 0.4943   | A | 11.66 | 0.0006398 | 0.4384 | 0.2436 | 0.272   | 0.7068 |
| 134 | 3 | exm2255707     | 134388550 | A | 0.5846  | 0.3864   | G | 11.8  | 0.0005936 | 2.235  | 0.2359 | 1.408   | 3.549  |
| 135 | 3 | exm357173      | 147121751 | T | 0.08462 | 0.2356   | C | 11.97 | 0.0005413 | 0.2999 | 0.3622 | 0.1474  | 0.6099 |
| 136 | 3 | exm363668      | 169518455 | C | 0.3385  | 0.5284   | T | 10.91 | 0.0009563 | 0.4566 | 0.2391 | 0.2858  | 0.7295 |
| 137 | 3 | exm2269688     | 170171738 | C | 0.5615  | 0.3466   | T | 14.03 | 0.0001794 | 2.414  | 0.2373 | 1.516   | 3.845  |
| 138 | 3 | exm2255870     | 183508590 | G | 0.08462 | 0.005682 | A | 12.36 | 0.0004376 | 16.18  | 1.051  | 2.061   | 127    |
| 139 | 3 | exm367360      | 183508714 | A | 0.06154 | 0        | G | 11.12 | 0.0008533 | NA     | NA     | NA      | NA     |
| 140 | 3 | exm376221      | 195935346 | T | 0       | 0.1023   | C | 14.13 | 0.0001709 | 0      | inf    | 0       | nan    |
| 141 | 4 | exm380211      | 996165    | A | 0.1308  | 0.2955   | G | 11.61 | 0.0006554 | 0.3587 | 0.3082 | 0.1961  | 0.6563 |
| 142 | 4 | exm382553      | 2306259   | T | 0.2385  | 0.08046  | C | 14.73 | 0.0001241 | 3.579  | 0.3465 | 1.815   | 7.057  |
| 143 | 4 | exm389532      | 10079377  | T | 0       | 0.08523  | C | 11.65 | 0.0006418 | 0      | inf    | 0       | nan    |
| 144 | 4 | exm-rs7442317  | 29903052  | A | 0.3692  | 0.1989   | G | 10.98 | 0.0009215 | 2.358  | 0.2621 | 1.411   | 3.942  |
| 145 | 4 | exm404236      | 71346701  | G | 0.1846  | 0.358    | C | 11.04 | 0.0008912 | 0.4061 | 0.2754 | 0.2367  | 0.6967 |
| 146 | 4 | exm2256737     | 78734563  | A | 0.3154  | 0.5284   | G | 13.78 | 0.000205  | 0.4111 | 0.2417 | 0.256   | 0.6603 |
| 147 | 4 | exm408162      | 78987157  | G | 0.5615  | 0.3125   | A | 19.06 | 1.27E-05  | 2.818  | 0.2402 | 1.76    | 4.511  |
| 148 | 4 | exm2269935     | 79625240  | C | 0.3538  | 0.5455   | T | 11.04 | 0.0008928 | 0.4563 | 0.2378 | 0.2863  | 0.7273 |
| 149 | 4 | exm2265850     | 82318524  | A | 0.6077  | 0.4034   | G | 12.49 | 0.00041   | 2.291  | 0.2364 | 1.441   | 3.641  |
| 150 | 4 | exm411960      | 88415636  | C | 0.6231  | 0.3864   | G | 16.77 | 4.22E-05  | 2.625  | 0.2382 | 1.646   | 4.187  |
| 151 | 4 | exm411969      | 88416188  | T | 0.6231  | 0.3864   | G | 16.77 | 4.22E-05  | 2.625  | 0.2382 | 1.646   | 4.187  |

|     |   |                |           |   |          |         |   |       |           |         |        |          |        |
|-----|---|----------------|-----------|---|----------|---------|---|-------|-----------|---------|--------|----------|--------|
| 152 | 4 | exm2265740     | 106922960 | A | 0.3077   | 0.5057  | G | 11.97 | 0.0005397 | 0.4343  | 0.2431 | 0.2697   | 0.6995 |
| 153 | 4 | exm417605      | 107845794 | T | 0.1462   | 0.01705 | C | 18.68 | 1.55E-05  | 9.871   | 0.6331 | 2.854    | 34.14  |
| 154 | 4 | exm419255      | 113352397 | G | 0.5077   | 0.2955  | A | 14.22 | 0.000163  | 2.459   | 0.241  | 1.533    | 3.944  |
| 155 | 4 | exm419280      | 113352899 | G | 0.5077   | 0.2955  | A | 14.22 | 0.000163  | 2.459   | 0.241  | 1.533    | 3.944  |
| 156 | 4 | exm2265770     | 147246721 | A | 0.3308   | 0.5284  | G | 11.83 | 0.0005832 | 0.4411  | 0.2399 | 0.2756   | 0.7059 |
| 157 | 4 | exm2265806     | 183777997 | A | 0.5615   | 0.3295  | G | 16.44 | 5.03E-05  | 2.606   | 0.2387 | 1.632    | 4.16   |
| 158 | 5 | exm2261915     | 3311493   | T | 0.06154  | 0.2102  | C | 13.18 | 0.0002831 | 0.2463  | 0.4092 | 0.1105   | 0.5493 |
| 159 | 5 | exm-rs7729273  | 7228047   | T | 0.2154   | 0.04545 | C | 20.8  | 5.10E-06  | 5.765   | 0.4201 | 2.53     | 13.13  |
| 160 | 5 | exm2266062     | 23020866  | G | 0.3462   | 0.5398  | A | 11.29 | 0.0007777 | 0.4514  | 0.2385 | 0.2829   | 0.7203 |
| 161 | 5 | exm-rs2886725  | 37770836  | A | 0.04615  | 0.2216  | G | 18.35 | 1.84E-05  | 0.17    | 0.4557 | 0.06958  | 0.4152 |
| 162 | 5 | exm451684      | 38955796  | A | 0.4462   | 0.2273  | G | 16.46 | 4.98E-05  | 2.739   | 0.252  | 1.672    | 4.488  |
| 163 | 5 | exm452637      | 41033163  | C | 0.007692 | 0.1136  | T | 13.13 | 0.0002906 | 0.06047 | 1.032  | 0.008006 | 0.4567 |
| 164 | 5 | exm452676      | 41048533  | T | 0.3538   | 0.1818  | C | 11.65 | 0.0006418 | 2.464   | 0.268  | 1.457    | 4.167  |
| 165 | 5 | exm2266081     | 50057729  | A | 0.6077   | 0.4148  | G | 11.13 | 0.0008486 | 2.186   | 0.236  | 1.376    | 3.471  |
| 166 | 5 | exm459265      | 70308262  | T | 0        | 0.09091 | C | 12.47 | 0.0004135 | 0       | inf    | 0        | nan    |
| 167 | 5 | exm459568      | 70818150  | G | 0.1774   | 0.05357 | C | 11.53 | 0.0006842 | 3.81    | 0.4155 | 1.688    | 8.603  |
| 168 | 5 | exm461037      | 73985215  | G | 0.1308   | 0.3352  | A | 16.74 | 4.28E-05  | 0.2983  | 0.3052 | 0.164    | 0.5427 |
| 169 | 5 | exm464559      | 79950781  | A | 0.1953   | 0.4318  | G | 18.68 | 1.54E-05  | 0.3194  | 0.2699 | 0.1882   | 0.5421 |
| 170 | 5 | exm2266097     | 86366246  | G | 0.06154  | 0.2045  | A | 12.42 | 0.0004247 | 0.255   | 0.41   | 0.1142   | 0.5696 |
| 171 | 5 | exm466476      | 89979518  | T | 0.06154  | 0.2069  | C | 12.7  | 0.0003656 | 0.2514  | 0.4101 | 0.1125   | 0.5616 |
| 172 | 5 | exm466624      | 90012379  | A | 0.1719   | 0.05172 | G | 11.56 | 0.0006745 | 3.805   | 0.4148 | 1.688    | 8.579  |
| 173 | 5 | exm2270224     | 91840637  | T | 0.1462   | 0.3523  | G | 16.32 | 5.35E-05  | 0.3147  | 0.2942 | 0.1768   | 0.5602 |
| 174 | 5 | exm-rs4869419  | 92567539  | G | 0.05385  | 0.1932  | A | 12.51 | 0.0004047 | 0.2377  | 0.4329 | 0.1017   | 0.5553 |
| 175 | 5 | exm-rs17376456 | 93557702  | G | 0.1077   | 0.2614  | A | 11.2  | 0.0008173 | 0.3411  | 0.3309 | 0.1783   | 0.6524 |
| 176 | 5 | exm-rs17418283 | 94154588  | C | 0.4154   | 0.2299  | T | 11.99 | 0.0005358 | 2.38    | 0.2533 | 1.449    | 3.91   |
| 177 | 5 | exm468894      | 96503523  | C | 0.5769   | 0.3693  | T | 12.98 | 0.0003141 | 2.329   | 0.2365 | 1.465    | 3.701  |
| 178 | 5 | exm468932      | 96513471  | C | 0.1905   | 0.4034  | G | 15.44 | 8.51E-05  | 0.348   | 0.274  | 0.2034   | 0.5954 |
| 179 | 5 | exm2270091     | 96731630  | T | 0.3769   | 0.5739  | C | 11.6  | 0.0006579 | 0.4492  | 0.2366 | 0.2825   | 0.7143 |
| 180 | 5 | exm-rs13355008 | 100695179 | T | 0.2      | 0.3765  | C | 10.92 | 0.0009491 | 0.4141  | 0.2704 | 0.2437   | 0.7035 |
| 181 | 5 | exm2270231     | 103670162 | T | 0.03846  | 0.2045  | C | 17.77 | 2.49E-05  | 0.1556  | 0.4929 | 0.0592   | 0.4087 |
| 182 | 5 | exm-rs1318772  | 112723567 | G | 0.04615  | 0.1932  | A | 14.22 | 0.0001622 | 0.2021  | 0.4595 | 0.08211  | 0.4974 |

|     |   |                |           |   |          |         |   |       |           |         |        |          |        |
|-----|---|----------------|-----------|---|----------|---------|---|-------|-----------|---------|--------|----------|--------|
| 183 | 5 | exm2270111     | 112823998 | T | 0.5923   | 0.3636  | C | 15.74 | 7.28E-05  | 2.542   | 0.2375 | 1.596    | 4.05   |
| 184 | 5 | exm472550      | 115428381 | G | 0.1923   | 0.05682 | T | 13.55 | 0.0002322 | 3.952   | 0.3944 | 1.825    | 8.562  |
| 185 | 5 | exm479249      | 135287029 | T | 0.5308   | 0.3182  | C | 13.99 | 0.0001843 | 2.424   | 0.2389 | 1.518    | 3.871  |
| 186 | 5 | exm2266014     | 140522425 | A | 0.5154   | 0.2955  | G | 15.22 | 9.58E-05  | 2.536   | 0.241  | 1.581    | 4.067  |
| 187 | 5 | exm2266018     | 145270339 | G | 0.2923   | 0.5227  | A | 16.25 | 5.56E-05  | 0.3771  | 0.2449 | 0.2334   | 0.6094 |
| 188 | 5 | exm493171      | 148206473 | G | 0.1615   | 0.3466  | C | 13.05 | 0.0003028 | 0.3632  | 0.2862 | 0.2073   | 0.6364 |
| 189 | 5 | exm494951      | 149509446 | T | 0.1077   | 0.01136 | C | 14    | 0.0001827 | 10.5    | 0.7654 | 2.343    | 47.06  |
| 190 | 5 | exm497540      | 150947390 | T | 0        | 0.1136  | C | 15.81 | 7.02E-05  | 0       | inf    | 0        | nan    |
| 191 | 5 | exm2257065     | 156671437 | T | 0.03077  | 0.1667  | G | 14.2  | 0.0001643 | 0.1587  | 0.5471 | 0.05432  | 0.4638 |
| 192 | 5 | exm2266139     | 167657421 | A | 0.2538   | 0.4602  | G | 13.62 | 0.0002233 | 0.399   | 0.252  | 0.2435   | 0.6538 |
| 193 | 5 | exm-rs11249661 | 179277874 | A | 0.4308   | 0.25    | G | 11.11 | 0.0008605 | 2.27    | 0.2483 | 1.395    | 3.694  |
| 194 | 6 | exm-rs675209   | 7102084   | T | 0.2154   | 0.4261  | C | 14.87 | 0.000115  | 0.3697  | 0.2622 | 0.2211   | 0.618  |
| 195 | 6 | exm2266156     | 11477493  | A | 0.5538   | 0.3068  | G | 18.84 | 1.42E-05  | 2.805   | 0.2405 | 1.75     | 4.494  |
| 196 | 6 | exm-rs16883019 | 19969638  | C | 0.02308  | 0.1307  | T | 11.14 | 0.0008469 | 0.1571  | 0.6255 | 0.04612  | 0.5354 |
| 197 | 6 | exm2257690     | 23774487  | A | 0.6231   | 0.358   | G | 21.1  | 4.37E-06  | 2.965   | 0.2397 | 1.853    | 4.743  |
| 198 | 6 | exm523653      | 27277051  | T | 0.1692   | 0.3466  | C | 11.9  | 0.0005617 | 0.384   | 0.2825 | 0.2208   | 0.6681 |
| 199 | 6 | exm523713      | 27279852  | C | 0.2      | 0.05682 | T | 14.77 | 0.0001217 | 4.15    | 0.3926 | 1.923    | 8.958  |
| 200 | 6 | exm524368      | 27925367  | A | 0.06154  | 0.2216  | G | 14.73 | 0.0001238 | 0.2303  | 0.4076 | 0.1036   | 0.5121 |
| 201 | 6 | exm524507      | 28117331  | T | 0.007692 | 0.1591  | C | 19.98 | 7.84E-06  | 0.04097 | 1.025  | 0.005498 | 0.3054 |
| 202 | 6 | exm-rs9257819  | 29360183  | C | 0.2308   | 0.5398  | A | 29.55 | 5.46E-08  | 0.2558  | 0.2573 | 0.1545   | 0.4235 |
| 203 | 6 | exm-rs2022077  | 29361124  | A | 0.2344   | 0.5398  | T | 28.55 | 9.14E-08  | 0.261   | 0.2577 | 0.1575   | 0.4325 |
| 204 | 6 | exm525841      | 29364615  | T | 0.2308   | 0.5398  | G | 29.55 | 5.46E-08  | 0.2558  | 0.2573 | 0.1545   | 0.4235 |
| 205 | 6 | exm525845      | 29364643  | C | 0.2308   | 0.5398  | T | 29.55 | 5.46E-08  | 0.2558  | 0.2573 | 0.1545   | 0.4235 |
| 206 | 6 | exm525853      | 29364815  | G | 0.2308   | 0.5398  | C | 29.55 | 5.46E-08  | 0.2558  | 0.2573 | 0.1545   | 0.4235 |
| 207 | 6 | exm525854      | 29364835  | G | 0.2308   | 0.5465  | T | 30.5  | 3.34E-08  | 0.2489  | 0.2584 | 0.15     | 0.4131 |
| 208 | 6 | exm525859      | 29364951  | A | 0.2266   | 0.5398  | G | 30.1  | 4.10E-08  | 0.2498  | 0.2597 | 0.1501   | 0.4155 |
| 209 | 6 | exm-rs2073149  | 29365423  | A | 0.246    | 0.5795  | T | 33.14 | 8.57E-09  | 0.2367  | 0.2571 | 0.143    | 0.3918 |
| 210 | 6 | exm-rs1028411  | 29367399  | C | 0.2308   | 0.5398  | A | 29.55 | 5.46E-08  | 0.2558  | 0.2573 | 0.1545   | 0.4235 |
| 211 | 6 | exm-rs2394607  | 29369519  | C | 0.2538   | 0.5682  | T | 30.07 | 4.18E-08  | 0.2586  | 0.2525 | 0.1576   | 0.4241 |
| 212 | 6 | exm-rs720497   | 29382433  | G | 0.3769   | 0.2045  | C | 11.07 | 0.0008752 | 2.353   | 0.2601 | 1.413    | 3.917  |
| 213 | 6 | exm-rs7770592  | 29395747  | A | 0.1846   | 0.3693  | C | 12.37 | 0.0004369 | 0.3866  | 0.2748 | 0.2257   | 0.6625 |



|     |          |                      |                 |          |               |                |          |              |                 |              |              |              |              |
|-----|----------|----------------------|-----------------|----------|---------------|----------------|----------|--------------|-----------------|--------------|--------------|--------------|--------------|
| 214 | 6        | exm-rs1233493        | 29458241        | C        | 0.06154       | 0              | T        | 11           | 0.0009126       | NA           | NA           | NA           | NA           |
| 215 | 6        | exm-rs734960         | 29475142        | A        | 0.07692       | 0.2159         | G        | 10.92        | 0.0009509       | 0.3026       | 0.3767       | 0.1446       | 0.6332       |
| 216 | 6        | exm-rs1592410        | 29483968        | A        | 0.5538        | 0.3466         | G        | 13.07        | 0.0003          | 2.34         | 0.2371       | 1.47         | 3.725        |
| 217 | 6        | exm-rs724078         | 29489048        | G        | 0.3385        | 0.5795         | A        | 17.42        | 3.00E-05        | 0.3712       | 0.2402       | 0.2318       | 0.5943       |
| 218 | 6        | exm-rs995185         | 29529137        | A        | 0.1385        | 0.3125         | T        | 12.47        | 0.000414        | 0.3536       | 0.3015       | 0.1958       | 0.6385       |
| 219 | 6        | exm-rs926552         | 29548089        | T        | 0.06154       | 0              | C        | 11.12        | 0.0008533       | NA           | NA           | NA           | NA           |
| 220 | 6        | exm526267            | 29598286        | A        | 0             | 0.1047         | G        | 14.25        | 0.00016         | 0            | inf          | 0            | nan          |
| 221 | 6        | exm-rs2524005        | 29899677        | T        | 0.1077        | 0.2701         | C        | 12.24        | 0.0004682       | 0.3261       | 0.3305       | 0.1706       | 0.6232       |
| 222 | 6        | exm-rs356971         | 29979797        | C        | 0.07692       | 0.2216         | A        | 11.64        | 0.000647        | 0.2927       | 0.3759       | 0.1401       | 0.6115       |
| 223 | 6        | exm-rs165255         | 29989695        | G        | 0.1452        | 0.3375         | C        | 13.66        | 0.0002195       | 0.3333       | 0.3049       | 0.1834       | 0.6059       |
| 224 | 6        | exm-rs166327         | 30002881        | G        | 0.3538        | 0.5568         | A        | 12.36        | 0.0004376       | 0.4359       | 0.2381       | 0.2733       | 0.695        |
| 225 | 6        | exm-rs259938         | 30008003        | C        | 0.2154        | 0.4023         | G        | 11.9         | 0.0005613       | 0.4078       | 0.2635       | 0.2433       | 0.6835       |
| 226 | 6        | exm-rs1150739        | 30031345        | G        | 0.3538        | 0.5455         | A        | 11.04        | 0.0008928       | 0.4563       | 0.2378       | 0.2863       | 0.7273       |
| 227 | 6        | exm-rs1150735        | 30045199        | T        | 0.2385        | 0.4205         | C        | 10.99        | 0.0009173       | 0.4316       | 0.2563       | 0.2612       | 0.7132       |
| 228 | 6        | exm-rs1264709        | 30056476        | A        | 0.07692       | 0.2299         | T        | 12.67        | 0.0003718       | 0.2792       | 0.3752       | 0.1338       | 0.5824       |
| 229 | 6        | exm-rs2523734        | 30129676        | G        | 0.1923        | 0.375          | T        | 11.94        | 0.0005483       | 0.3968       | 0.2716       | 0.233        | 0.6757       |
| 230 | 6        | exm-rs1264569        | 30365320        | G        | 0.3306        | 0.142          | A        | 14.39        | 0.0001483       | 2.985        | 0.2951       | 1.674        | 5.324        |
| 231 | 6        | exm-rs3130654        | 30823075        | G        | 0.2462        | 0.09659        | C        | 12.44        | 0.000421        | 3.054        | 0.3264       | 1.611        | 5.791        |
| 232 | <b>6</b> | <b>exm-rs3130780</b> | <b>30874308</b> | <b>T</b> | <b>0.2462</b> | <b>0.07471</b> | <b>G</b> | <b>17.34</b> | <b>3.12E-05</b> | <b>4.044</b> | <b>0.353</b> | <b>2.025</b> | <b>8.077</b> |
| 233 | 6        | exm-rs2253705        | 30900094        | A        | 0.3462        | 0.125          | G        | 21.38        | 3.76E-06        | 3.706        | 0.2931       | 2.086        | 6.583        |
| 234 | 6        | exm-rs6933400        | 30907176        | T        | 0.3077        | 0.1193         | C        | 16.62        | 4.56E-05        | 3.28         | 0.3003       | 1.821        | 5.909        |
| 235 | 6        | exm529258            | 30919878        | C        | 0.3077        | 0.125          | G        | 15.45        | 8.49E-05        | 3.111        | 0.2967       | 1.739        | 5.566        |
| 236 | 6        | exm-rs3095150        | 30932532        | G        | 0.375         | 0.5852         | A        | 13.1         | 0.0002951       | 0.4252       | 0.2382       | 0.2666       | 0.6783       |
| 237 | 6        | exm-rs13191258       | 30978717        | T        | 0.01538       | 0.1322         | C        | 13.45        | 0.0002451       | 0.1026       | 0.7469       | 0.02373      | 0.4435       |
| 238 | 6        | exm-rs3871466        | 30983683        | G        | 0.06154       | 0.2011         | A        | 11.94        | 0.0005487       | 0.2604       | 0.4111       | 0.1164       | 0.5829       |
| 239 | 6        | exm-rs3869096        | 30984404        | C        | 0.06154       | 0.1932         | A        | 10.94        | 0.0009398       | 0.2739       | 0.4119       | 0.1222       | 0.614        |
| 240 | 6        | exm529509            | 30993567        | T        | 0.07692       | 0.2184         | G        | 11.2         | 0.0008182       | 0.2982       | 0.3768       | 0.1425       | 0.6242       |
| 241 | 6        | exm-rs2517550        | 31008368        | G        | 0.4           | 0.2159         | A        | 12.21        | 0.0004766       | 2.421        | 0.2562       | 1.465        | 4            |
| 242 | 6        | exm-rs3094188        | 31142245        | G        | 0.3923        | 0.2159         | T        | 11.28        | 0.0007834       | 2.344        | 0.2566       | 1.418        | 3.876        |
| 243 | 6        | exm-rs6921663        | 31154620        | C        | 0.09231       | 0.2384         | T        | 10.92        | 0.000953        | 0.3249       | 0.3519       | 0.163        | 0.6476       |
| 244 | 6        | exm-rs3132496        | 31208610        | C        | 0.6           | 0.392          | A        | 12.95        | 0.0003193       | 2.326        | 0.2364       | 1.464        | 3.697        |

|     |   |                |          |   |          |         |   |       |           |         |        |          |        |
|-----|---|----------------|----------|---|----------|---------|---|-------|-----------|---------|--------|----------|--------|
| 245 | 6 | exm-rs9264942  | 31274380 | T | 0.6      | 0.3693  | C | 15.98 | 6.39E-05  | 2.562   | 0.2376 | 1.608    | 4.081  |
| 246 | 6 | exm-rs2523590  | 31327064 | G | 0.1538   | 0.4059  | A | 22.43 | 2.18E-06  | 0.2661  | 0.2889 | 0.1511   | 0.4689 |
| 247 | 6 | exm-rs2523586  | 31327435 | C | 0.1308   | 0.3011  | A | 12.3  | 0.0004527 | 0.3491  | 0.3077 | 0.191    | 0.6381 |
| 248 | 6 | exm-rs1063632  | 31378510 | A | 0.03077  | 0.1989  | G | 19    | 1.31E-05  | 0.1279  | 0.5418 | 0.04422  | 0.3699 |
| 249 | 6 | exm530708      | 31379109 | A | 0.2615   | 0.4886  | G | 16.18 | 5.77E-05  | 0.3706  | 0.2501 | 0.227    | 0.6052 |
| 250 | 6 | exm530736      | 31382882 | A | 0.2154   | 0.4659  | C | 20.38 | 6.35E-06  | 0.3147  | 0.2614 | 0.1885   | 0.5253 |
| 251 | 6 | exm-rs10223421 | 31390055 | T | 0.2154   | 0.4659  | G | 20.38 | 6.35E-06  | 0.3147  | 0.2614 | 0.1885   | 0.5253 |
| 252 | 6 | exm-rs11752262 | 31431757 | G | 0.1      | 0.2841  | A | 15.5  | 8.26E-05  | 0.28    | 0.3368 | 0.1447   | 0.5418 |
| 253 | 6 | exm-rs2395029  | 31431780 | G | 0.01538  | 0.125   | T | 12.43 | 0.0004226 | 0.1094  | 0.7482 | 0.02524  | 0.474  |
| 254 | 6 | exm-rs11759988 | 31432861 | C | 0.1      | 0.2614  | T | 12.51 | 0.0004049 | 0.314   | 0.339  | 0.1616   | 0.6102 |
| 255 | 6 | exm-rs2516408  | 31463491 | T | 0.2154   | 0.4261  | C | 14.87 | 0.000115  | 0.3697  | 0.2622 | 0.2211   | 0.618  |
| 256 | 6 | exm-rs6916394  | 31464050 | C | 0.5      | 0.3103  | T | 11.24 | 0.0008026 | 2.222   | 0.24   | 1.388    | 3.557  |
| 257 | 6 | exm-rs4713468  | 31470875 | A | 0.5079   | 0.3046  | T | 12.7  | 0.0003654 | 2.357   | 0.2427 | 1.465    | 3.792  |
| 258 | 6 | exm-rs2844498  | 31476854 | A | 0.5846   | 0.375   | G | 13.21 | 0.0002785 | 2.346   | 0.2365 | 1.476    | 3.729  |
| 259 | 6 | exm-rs2246618  | 31478986 | T | 0.2154   | 0.4261  | C | 14.87 | 0.000115  | 0.3697  | 0.2622 | 0.2211   | 0.618  |
| 260 | 6 | exm-rs9267673  | 31883679 | T | 0.05385  | 0.2386  | C | 18.98 | 1.32E-05  | 0.1816  | 0.4269 | 0.07864  | 0.4192 |
| 261 | 6 | exm-rs7746553  | 31895973 | G | 0.1      | 0.3068  | C | 18.7  | 1.53E-05  | 0.251   | 0.3349 | 0.1302   | 0.484  |
| 262 | 6 | exm-rs4151664  | 31920873 | T | 0.04615  | 0.2102  | C | 16.67 | 4.46E-05  | 0.1818  | 0.4571 | 0.07421  | 0.4453 |
| 263 | 6 | exm-rs592229   | 31930441 | G | 0.2769   | 0.1136  | T | 13.33 | 0.0002607 | 2.987   | 0.3079 | 1.634    | 5.462  |
| 264 | 6 | exm533591      | 31938412 | T | 0.04615  | 0.1761  | G | 11.88 | 0.0005659 | 0.2263  | 0.4625 | 0.09143  | 0.5603 |
| 265 | 6 | exm-rs3130349  | 32147696 | A | 0.03077  | 0.1477  | G | 11.57 | 0.0006715 | 0.1832  | 0.5505 | 0.06226  | 0.5388 |
| 266 | 6 | exm535099      | 32185796 | T | 0.007692 | 0.1023  | C | 11.49 | 0.0007015 | 0.06804 | 1.034  | 0.008963 | 0.5166 |
| 267 | 6 | exm-rs13209234 | 32415975 | A | 0.03906  | 0.1648  | G | 11.79 | 0.0005957 | 0.2061  | 0.4994 | 0.07743  | 0.5484 |
| 268 | 6 | exm-rs3135006  | 32667119 | A | 0.2154   | 0.08046 | G | 11.38 | 0.0007439 | 3.137   | 0.351  | 1.577    | 6.242  |
| 269 | 6 | exm-rs2395296  | 32911814 | A | 0.2615   | 0.4659  | G | 13.27 | 0.00027   | 0.406   | 0.2503 | 0.2486   | 0.6631 |
| 270 | 6 | exm-rs209473   | 32922908 | C | 0.6154   | 0.3636  | A | 19.02 | 1.29E-05  | 2.8     | 0.2389 | 1.753    | 4.472  |
| 271 | 6 | exm-rs580962   | 32925692 | G | 0.3231   | 0.5852  | A | 20.61 | 5.63E-06  | 0.3383  | 0.242  | 0.2105   | 0.5436 |
| 272 | 6 | exm-rs516535   | 32942302 | C | 0.3231   | 0.5852  | T | 20.61 | 5.63E-06  | 0.3383  | 0.242  | 0.2105   | 0.5436 |
| 273 | 6 | exm-rs206777   | 32952546 | C | 0.3231   | 0.5568  | T | 16.46 | 4.97E-05  | 0.3799  | 0.2412 | 0.2367   | 0.6095 |
| 274 | 6 | exm-rs206776   | 32953711 | A | 0.2462   | 0.4545  | G | 13.99 | 0.0001835 | 0.3918  | 0.2537 | 0.2383   | 0.6443 |
| 275 | 6 | exm-rs188245   | 32955976 | C | 0.3615   | 0.1932  | T | 10.89 | 0.0009676 | 2.365   | 0.2642 | 1.409    | 3.969  |

|     |   |                |           |   |          |         |   |       |           |         |        |          |        |
|-----|---|----------------|-----------|---|----------|---------|---|-------|-----------|---------|--------|----------|--------|
| 276 | 6 | exm-rs172276   | 32959770  | A | 0.3462   | 0.1761  | T | 11.58 | 0.0006675 | 2.476   | 0.2704 | 1.457    | 4.207  |
| 277 | 6 | exm-rs206768   | 32961387  | C | 0.3538   | 0.1761  | T | 12.54 | 0.0003985 | 2.561   | 0.2698 | 1.509    | 4.347  |
| 278 | 6 | exm-rs206767   | 32962420  | G | 0.3672   | 0.6047  | T | 16.55 | 4.73E-05  | 0.3794  | 0.2407 | 0.2367   | 0.6081 |
| 279 | 6 | exm-rs206765   | 32964696  | A | 0.4538   | 0.2386  | T | 15.66 | 7.58E-05  | 2.651   | 0.2496 | 1.625    | 4.324  |
| 280 | 6 | exm-rs6911639  | 32978178  | C | 0.3308   | 0.1648  | T | 11.45 | 0.0007147 | 2.505   | 0.2757 | 1.459    | 4.301  |
| 281 | 6 | exm-rs443623   | 32996350  | A | 0.06923  | 0.2216  | T | 13.12 | 0.0002916 | 0.2613  | 0.3903 | 0.1216   | 0.5615 |
| 282 | 6 | exm540479      | 34850826  | C | 0.01538  | 0.1364  | G | 14.08 | 0.0001756 | 0.09896 | 0.7457 | 0.02295  | 0.4268 |
| 283 | 6 | exm545759      | 41310705  | T | 0        | 0.08523 | C | 11.65 | 0.0006418 | 0       | inf    | 0        | nan    |
| 284 | 6 | exm-rs9395066  | 45095163  | C | 0.3615   | 0.5568  | A | 11.44 | 0.0007201 | 0.4507  | 0.2374 | 0.283    | 0.7177 |
| 285 | 6 | exm556612      | 54805688  | C | 0.4692   | 0.2557  | A | 15.06 | 0.0001041 | 2.574   | 0.2465 | 1.588    | 4.172  |
| 286 | 6 | exm556646      | 54806489  | A | 0.4692   | 0.2557  | C | 15.06 | 0.0001041 | 2.574   | 0.2465 | 1.588    | 4.172  |
| 287 | 6 | exm2266221     | 79196788  | A | 0.2769   | 0.4659  | G | 11.27 | 0.0007869 | 0.439   | 0.2475 | 0.2703   | 0.7131 |
| 288 | 6 | exm-rs4840086  | 100208438 | G | 0.6      | 0.3864  | A | 13.68 | 0.0002169 | 2.382   | 0.2367 | 1.498    | 3.788  |
| 289 | 6 | exm568818      | 105609468 | T | 0        | 0.142   | C | 20.11 | 7.32E-06  | 0       | inf    | 0        | nan    |
| 290 | 6 | exm-rs9374227  | 111283592 | T | 0.1      | 0.25    | C | 11.1  | 0.0008637 | 0.3333  | 0.3403 | 0.1711   | 0.6494 |
| 291 | 6 | exm573638      | 116784797 | A | 0.007692 | 0.1337  | G | 16.08 | 6.09E-05  | 0.05022 | 1.029  | 0.006689 | 0.377  |
| 292 | 6 | exm2270399     | 125576372 | C | 0.3462   | 0.5625  | T | 14.05 | 0.0001783 | 0.4118  | 0.2389 | 0.2578   | 0.6577 |
| 293 | 6 | exm2257503     | 126248374 | C | 0.3308   | 0.5398  | T | 13.19 | 0.0002812 | 0.4214  | 0.24   | 0.2633   | 0.6746 |
| 294 | 6 | exm581368      | 137482840 | G | 0.1      | 0.01136 | A | 12.6  | 0.0003855 | 9.667   | 0.7689 | 2.142    | 43.63  |
| 295 | 6 | exm582318      | 139233946 | T | 0.06923  | 0       | C | 12.55 | 0.0003954 | NA      | NA     | NA       | NA     |
| 296 | 6 | exm582791      | 142691549 | C | 0.09231  | 0.2386  | A | 11.02 | 0.0009031 | 0.3245  | 0.3508 | 0.1631   | 0.6453 |
| 297 | 6 | exm583060      | 143092754 | A | 0.01538  | 0.1307  | G | 13.25 | 0.0002728 | 0.1039  | 0.7469 | 0.02405  | 0.4493 |
| 298 | 6 | exm584047      | 145069600 | A | 0.07627  | 0       | G | 12.61 | 0.0003833 | NA      | NA     | NA       | NA     |
| 299 | 6 | exm584803      | 147136244 | A | 0.5403   | 0.3333  | G | 12.54 | 0.0003988 | 2.351   | 0.2434 | 1.459    | 3.788  |
| 300 | 6 | exm585864      | 150212003 | T | 0.05385  | 0.2898  | C | 27.09 | 1.94E-07  | 0.1395  | 0.4226 | 0.06093  | 0.3193 |
| 301 | 6 | exm585866      | 150212034 | A | 0        | 0.07955 | G | 10.84 | 0.0009951 | 0       | inf    | 0        | nan    |
| 302 | 6 | exm2270429     | 150525260 | C | 0.5769   | 0.358   | T | 14.48 | 0.0001417 | 2.446   | 0.2371 | 1.537    | 3.893  |
| 303 | 6 | exm2262071     | 151327848 | A | 0.3308   | 0.5909  | G | 20.27 | 6.72E-06  | 0.3422  | 0.2414 | 0.2132   | 0.5492 |
| 304 | 6 | exm-rs7747960  | 152791474 | A | 0.1032   | 0.259   | C | 11.23 | 0.0008064 | 0.3291  | 0.3423 | 0.1682   | 0.6437 |
| 305 | 7 | exm-rs10488360 | 4411209   | A | 0.5769   | 0.3471  | G | 15.75 | 7.23E-05  | 2.565   | 0.2397 | 1.604    | 4.104  |
| 306 | 7 | exm-rs10499504 | 17561583  | G | 0.007692 | 0.125   | A | 14.8  | 0.0001194 | 0.05426 | 1.029  | 0.007216 | 0.4081 |

|     |   |                |           |   |          |         |   |       |           |         |        |          |        |
|-----|---|----------------|-----------|---|----------|---------|---|-------|-----------|---------|--------|----------|--------|
| 307 | 7 | exm-rs12155172 | 20994491  | A | 0.2538   | 0.09091 | G | 14.76 | 0.0001221 | 3.402   | 0.3307 | 1.779    | 6.505  |
| 308 | 7 | exm608825      | 21901540  | C | 0.02344  | 0.1453  | T | 12.89 | 0.0003305 | 0.1411  | 0.623  | 0.04162  | 0.4785 |
| 309 | 7 | exm611740      | 29519929  | G | 0.2385   | 0.08721 | A | 13.12 | 0.0002924 | 3.277   | 0.3397 | 1.684    | 6.378  |
| 310 | 7 | exm-rs6974491  | 37374510  | A | 0.1613   | 0.04706 | G | 10.86 | 0.0009837 | 3.894   | 0.4368 | 1.654    | 9.167  |
| 311 | 7 | exm618517      | 44874113  | T | 0.3065   | 0.5698  | C | 20.12 | 7.29E-06  | 0.3336  | 0.2483 | 0.2051   | 0.5428 |
| 312 | 7 | exm2264260     | 46463342  | C | 0.1231   | 0.3409  | A | 19.01 | 1.30E-05  | 0.2713  | 0.3107 | 0.1476   | 0.4989 |
| 313 | 7 | exm-rs1012036  | 52472450  | T | 0.1385   | 0.3663  | C | 19.58 | 9.66E-06  | 0.2781  | 0.2992 | 0.1547   | 0.4998 |
| 314 | 7 | exm2266423     | 69006876  | A | 0.5385   | 0.3466  | G | 11.24 | 0.0007992 | 2.199   | 0.2367 | 1.383    | 3.498  |
| 315 | 7 | exm-rs6943555  | 69806023  | A | 0.5476   | 0.2989  | T | 18.79 | 1.46E-05  | 2.84    | 0.2439 | 1.761    | 4.58   |
| 316 | 7 | exm625784      | 73097654  | T | 0.5538   | 0.3636  | C | 10.96 | 0.000933  | 2.172   | 0.236  | 1.368    | 3.45   |
| 317 | 7 | exm629018      | 76950686  | A | 0.01538  | 0.142   | C | 14.91 | 0.0001127 | 0.09438 | 0.7446 | 0.02193  | 0.4061 |
| 318 | 7 | exm2270768     | 84709356  | T | 0.4      | 0.1761  | C | 18.96 | 1.34E-05  | 3.118   | 0.2668 | 1.848    | 5.261  |
| 319 | 7 | exm-rs1767742  | 86625854  | C | 0.4769   | 0.2841  | A | 11.98 | 0.0005373 | 2.298   | 0.2424 | 1.429    | 3.695  |
| 320 | 7 | exm2266441     | 87220886  | G | 0.6016   | 0.3977  | A | 12.33 | 0.0004459 | 2.286   | 0.2373 | 1.436    | 3.64   |
| 321 | 7 | exm633222      | 91630620  | T | 0.5231   | 0.2898  | G | 17.13 | 3.50E-05  | 2.688   | 0.2417 | 1.674    | 4.318  |
| 322 | 7 | exm633461      | 91712698  | G | 0.5154   | 0.2701  | A | 19.1  | 1.24E-05  | 2.874   | 0.2448 | 1.778    | 4.644  |
| 323 | 7 | exm2264243     | 91726927  | C | 0.5231   | 0.2955  | A | 16.25 | 5.54E-05  | 2.615   | 0.2411 | 1.63     | 4.195  |
| 324 | 7 | exm2266446     | 91974757  | A | 0.5538   | 0.3563  | G | 11.78 | 0.0005995 | 2.242   | 0.237  | 1.409    | 3.569  |
| 325 | 7 | exm633881      | 92028039  | C | 0.5615   | 0.3636  | A | 11.84 | 0.0005787 | 2.241   | 0.2362 | 1.411    | 3.561  |
| 326 | 7 | exm634427      | 92733975  | A | 0.007692 | 0.1149  | G | 13.31 | 0.0002641 | 0.05969 | 1.032  | 0.007903 | 0.4508 |
| 327 | 7 | exm634435      | 92734051  | T | 0.007692 | 0.1023  | C | 11.49 | 0.0007015 | 0.06804 | 1.034  | 0.008963 | 0.5166 |
| 328 | 7 | exm639333      | 99669802  | G | 0.02308  | 0.1364  | A | 11.93 | 0.000553  | 0.1496  | 0.6241 | 0.04403  | 0.5083 |
| 329 | 7 | exm-rs7385804  | 100235970 | C | 0.2462   | 0.4716  | A | 16.2  | 5.70E-05  | 0.3659  | 0.2535 | 0.2226   | 0.6013 |
| 330 | 7 | exm643074      | 100488658 | C | 0.2923   | 0.4943  | G | 12.63 | 0.00038   | 0.4225  | 0.2448 | 0.2615   | 0.6827 |
| 331 | 7 | exm2266456     | 101288516 | G | 0.3      | 0.4886  | A | 11.01 | 0.0009056 | 0.4485  | 0.2437 | 0.2782   | 0.7231 |
| 332 | 7 | exm2270664     | 106642123 | T | 0.2538   | 0.4483  | C | 12.13 | 0.0004951 | 0.4187  | 0.2527 | 0.2552   | 0.6871 |
| 333 | 7 | exm649118      | 107002504 | C | 0.1      | 0.01136 | T | 12.6  | 0.0003855 | 9.667   | 0.7689 | 2.142    | 43.63  |
| 334 | 7 | exm650406      | 107800936 | T | 0.09231  | 0.2701  | C | 15.04 | 0.0001053 | 0.2748  | 0.3478 | 0.139    | 0.5433 |
| 335 | 7 | exm655800      | 128312463 | G | 0.1923   | 0.0625  | C | 12.14 | 0.0004943 | 3.571   | 0.3827 | 1.687    | 7.562  |
| 336 | 7 | exm655815      | 128315882 | A | 0.2969   | 0.1337  | C | 12.06 | 0.0005153 | 2.735   | 0.296  | 1.531    | 4.886  |
| 337 | 7 | exm655820      | 128317658 | T | 0.3      | 0.142   | C | 11.28 | 0.0007842 | 2.589   | 0.2885 | 1.47     | 4.557  |

|     |   |                |           |   |          |         |   |       |           |         |        |          |        |
|-----|---|----------------|-----------|---|----------|---------|---|-------|-----------|---------|--------|----------|--------|
| 338 | 7 | exm655833      | 128323034 | G | 0.3      | 0.142   | A | 11.28 | 0.0007842 | 2.589   | 0.2885 | 1.47     | 4.557  |
| 339 | 7 | exm657813      | 130008259 | G | 0.007692 | 0.1034  | A | 11.64 | 0.0006441 | 0.06718 | 1.034  | 0.008849 | 0.5101 |
| 340 | 7 | exm-rs1106683  | 131453525 | A | 0.1846   | 0.05682 | G | 12.36 | 0.0004376 | 3.758   | 0.3964 | 1.728    | 8.174  |
| 341 | 7 | exm-rs1106684  | 131453665 | G | 0.1846   | 0.06024 | C | 11.09 | 0.0008668 | 3.532   | 0.3969 | 1.623    | 7.689  |
| 342 | 7 | exm-rs802568   | 145959243 | G | 0.1923   | 0.0625  | T | 12.14 | 0.0004943 | 3.571   | 0.3827 | 1.687    | 7.562  |
| 343 | 7 | exm2266575     | 146020936 | G | 0.2538   | 0.09659 | A | 13.53 | 0.0002352 | 3.182   | 0.3252 | 1.682    | 6.018  |
| 344 | 7 | exm2270806     | 157880211 | C | 0.05385  | 0.1905  | T | 12.03 | 0.000524  | 0.2419  | 0.4354 | 0.103    | 0.5678 |
| 345 | 8 | exm2270814     | 4809686   | C | 0.5462   | 0.3353  | T | 13.39 | 0.000253  | 2.386   | 0.2396 | 1.492    | 3.816  |
| 346 | 8 | exm680383      | 8560602   | T | 0.1484   | 0.3239  | C | 12.16 | 0.0004875 | 0.3639  | 0.2962 | 0.2036   | 0.6504 |
| 347 | 8 | exm2273446     | 17503316  | G | 0        | 0.08523 | T | 11.65 | 0.0006418 | 0       | inf    | 0        | nan    |
| 348 | 8 | exm695209      | 36767024  | C | 0.2462   | 0.4489  | T | 13.29 | 0.0002666 | 0.4009  | 0.2538 | 0.2438   | 0.6593 |
| 349 | 8 | exm-rs9650315  | 57155598  | T | 0.1066   | 0.3077  | G | 16.17 | 5.79E-05  | 0.2683  | 0.3409 | 0.1376   | 0.5234 |
| 350 | 8 | exm-rs6995588  | 61003897  | T | 0.01538  | 0.1379  | C | 14.29 | 0.0001569 | 0.09766 | 0.7458 | 0.02264  | 0.4212 |
| 351 | 8 | exm2262509     | 62172668  | A | 0.2769   | 0.483   | C | 13.28 | 0.0002687 | 0.41    | 0.2473 | 0.2525   | 0.6658 |
| 352 | 8 | exm-rs16933415 | 68497939  | C | 0.1615   | 0.04545 | T | 11.74 | 0.0006102 | 4.046   | 0.4333 | 1.731    | 9.459  |
| 353 | 8 | exm2266637     | 70954335  | A | 0.1692   | 0.3466  | G | 11.9  | 0.0005617 | 0.384   | 0.2825 | 0.2208   | 0.6681 |
| 354 | 8 | exm2270983     | 71164680  | G | 0.2308   | 0.4713  | T | 18.5  | 1.70E-05  | 0.3366  | 0.2577 | 0.2031   | 0.5577 |
| 355 | 8 | exm2270985     | 73963866  | T | 0.02308  | 0.142   | G | 12.73 | 0.0003598 | 0.1427  | 0.6228 | 0.0421   | 0.4836 |
| 356 | 8 | exm2270876     | 78530715  | T | 0.3231   | 0.5795  | C | 19.74 | 8.87E-06  | 0.3463  | 0.2418 | 0.2155   | 0.5562 |
| 357 | 8 | exm2266647     | 79417222  | G | 0.5077   | 0.233   | A | 24.82 | 6.30E-07  | 3.396   | 0.2501 | 2.08     | 5.544  |
| 358 | 8 | exm-rs6473383  | 83669120  | A | 0.09016  | 0.2531  | G | 12.35 | 0.000441  | 0.2925  | 0.3641 | 0.1433   | 0.597  |
| 359 | 8 | exm713190      | 101648164 | G | 0.1846   | 0.3807  | C | 13.76 | 0.0002081 | 0.3683  | 0.2742 | 0.2152   | 0.6305 |
| 360 | 8 | exm-rs16872085 | 105957540 | G | 0.2077   | 0.07386 | A | 11.79 | 0.0005971 | 3.287   | 0.3603 | 1.622    | 6.66   |
| 361 | 8 | exm715065      | 107773675 | C | 0        | 0.08523 | T | 11.65 | 0.0006418 | 0       | inf    | 0        | nan    |
| 362 | 8 | exm718494      | 123966085 | A | 0.03077  | 0.1591  | G | 13.15 | 0.0002877 | 0.1678  | 0.5481 | 0.05731  | 0.4913 |
| 363 | 8 | exm719207      | 124658203 | C | 0.03077  | 0.1534  | T | 12.35 | 0.0004405 | 0.1752  | 0.5493 | 0.0597   | 0.5141 |
| 364 | 8 | exm719236      | 124663987 | G | 0.02308  | 0.1534  | C | 14.36 | 0.0001507 | 0.1304  | 0.6204 | 0.03864  | 0.4398 |
| 365 | 8 | exm2258655     | 129384895 | C | 0.6077   | 0.3693  | A | 17.05 | 3.63E-05  | 2.645   | 0.238  | 1.659    | 4.218  |
| 366 | 8 | exm-rs1876201  | 139982997 | A | 0.2462   | 0.4602  | G | 14.71 | 0.0001253 | 0.383   | 0.2536 | 0.233    | 0.6296 |
| 367 | 8 | exm724389      | 142367087 | T | 0.2769   | 0.1092  | C | 14.13 | 0.000171  | 3.124   | 0.3122 | 1.694    | 5.762  |
| 368 | 8 | exm2266705     | 143310815 | A | 0.2769   | 0.4886  | G | 13.98 | 0.0001848 | 0.4008  | 0.2473 | 0.2468   | 0.6508 |

|     |    |                |           |   |         |          |   |       |           |        |        |        |        |
|-----|----|----------------|-----------|---|---------|----------|---|-------|-----------|--------|--------|--------|--------|
| 369 | 8  | exm727185      | 144672047 | T | 0       | 0.09091  | C | 12.47 | 0.0004135 | 0      | inf    | 0      | nan    |
| 370 | 8  | exm731612      | 145603114 | C | 0.2692  | 0.4545   | A | 10.95 | 0.0009379 | 0.4421 | 0.249  | 0.2714 | 0.7203 |
| 371 | 8  | exm732031      | 145639726 | T | 0.3538  | 0.5747   | C | 14.54 | 0.0001371 | 0.4052 | 0.2391 | 0.2536 | 0.6475 |
| 372 | 9  | exm734722      | 334337    | G | 0.4453  | 0.2045   | A | 20.23 | 6.86E-06  | 3.122  | 0.258  | 1.883  | 5.176  |
| 373 | 9  | exm741237      | 18639300  | A | 0       | 0.07955  | G | 10.84 | 0.0009951 | 0      | inf    | 0      | nan    |
| 374 | 9  | exm-rs1063192  | 22003367  | C | 0.1154  | 0.3068   | T | 15.69 | 7.46E-05  | 0.2947 | 0.3195 | 0.1575 | 0.5512 |
| 375 | 9  | exm-rs564398   | 22029547  | G | 0.1231  | 0.3011   | A | 13.57 | 0.0002293 | 0.3257 | 0.3135 | 0.1762 | 0.6021 |
| 376 | 9  | exm-rs7865618  | 22031005  | G | 0.1231  | 0.3011   | A | 13.57 | 0.0002293 | 0.3257 | 0.3135 | 0.1762 | 0.6021 |
| 377 | 9  | exm-rs2157719  | 22033366  | G | 0.1231  | 0.3011   | A | 13.57 | 0.0002293 | 0.3257 | 0.3135 | 0.1762 | 0.6021 |
| 378 | 9  | exm-rs1412829  | 22043926  | C | 0.1231  | 0.3011   | T | 13.57 | 0.0002293 | 0.3257 | 0.3135 | 0.1762 | 0.6021 |
| 379 | 9  | exm-rs1889899  | 26789940  | G | 0.5462  | 0.3239   | A | 15.18 | 9.75E-05  | 2.512  | 0.2387 | 1.574  | 4.011  |
| 380 | 9  | exm744049      | 27009100  | C | 0.1016  | 0.2529   | T | 11.03 | 0.0008978 | 0.334  | 0.3406 | 0.1713 | 0.6512 |
| 381 | 9  | exm2266809     | 33426434  | A | 0.3385  | 0.5398   | G | 12.22 | 0.000472  | 0.4362 | 0.2392 | 0.273  | 0.6972 |
| 382 | 9  | exm747610      | 34724241  | A | 0.3154  | 0.5057   | C | 11.04 | 0.0008925 | 0.4502 | 0.2421 | 0.2801 | 0.7236 |
| 383 | 9  | exm748413      | 35295880  | A | 0       | 0.08621  | C | 11.79 | 0.000596  | 0      | inf    | 0      | nan    |
| 384 | 9  | exm750210      | 35853517  | T | 0.07812 | 0.005747 | C | 11.01 | 0.0009074 | 14.66  | 1.056  | 1.852  | 116.1  |
| 385 | 9  | exm-rs4745062  | 73784264  | T | 0.3231  | 0.523    | C | 12.08 | 0.0005087 | 0.4353 | 0.2413 | 0.2713 | 0.6985 |
| 386 | 9  | exm-rs10869758 | 78965376  | T | 0.08462 | 0.2273   | C | 10.96 | 0.000933  | 0.3143 | 0.3629 | 0.1543 | 0.64   |
| 387 | 9  | exm2271094     | 80515456  | G | 0.2538  | 0.4489   | T | 12.25 | 0.0004641 | 0.4177 | 0.2522 | 0.2548 | 0.6847 |
| 388 | 9  | exm760409      | 92003679  | T | 0.2308  | 0.08621  | C | 12.33 | 0.0004457 | 3.18   | 0.341  | 1.63   | 6.204  |
| 389 | 9  | exm2271111     | 94508700  | T | 0.5692  | 0.3636   | C | 12.76 | 0.0003532 | 2.312  | 0.2365 | 1.455  | 3.676  |
| 390 | 9  | exm765802      | 100684757 | G | 0.4538  | 0.267    | A | 11.52 | 0.0006871 | 2.281  | 0.2451 | 1.411  | 3.687  |
| 391 | 9  | exm-rs755109   | 100696203 | C | 0.4462  | 0.2614   | T | 11.38 | 0.0007423 | 2.277  | 0.2461 | 1.405  | 3.688  |
| 392 | 9  | exm2262583     | 118869883 | C | 0.2308  | 0.4148   | T | 11.34 | 0.0007598 | 0.4233 | 0.2583 | 0.2551 | 0.7023 |
| 393 | 9  | exm779307      | 125391127 | T | 0.1385  | 0.3466   | C | 16.91 | 3.92E-05  | 0.303  | 0.2993 | 0.1685 | 0.5447 |
| 394 | 9  | exm779314      | 125391241 | A | 0.1154  | 0.3239   | G | 18.06 | 2.14E-05  | 0.2723 | 0.3183 | 0.1459 | 0.5082 |
| 395 | 9  | exm779568      | 125512908 | G | 0       | 0.07955  | T | 10.84 | 0.0009951 | 0      | inf    | 0      | nan    |
| 396 | 9  | exm-rs10818918 | 126860510 | A | 0.1     | 0.2614   | G | 12.51 | 0.0004049 | 0.314  | 0.339  | 0.1616 | 0.6102 |
| 397 | 9  | exm2259238     | 139418260 | A | 0.5923  | 0.3977   | G | 11.34 | 0.000758  | 2.2    | 0.2357 | 1.386  | 3.492  |
| 398 | 9  | exm799291      | 139634495 | A | 0.3077  | 0.142    | G | 12.26 | 0.0004619 | 2.684  | 0.2876 | 1.528  | 4.717  |
| 399 | 10 | exm-rs3136618  | 6001696   | A | 0.5538  | 0.3409   | G | 13.82 | 0.000201  | 2.4    | 0.2375 | 1.507  | 3.823  |

|     |    |                |           |   |         |         |   |       |           |         |        |         |        |
|-----|----|----------------|-----------|---|---------|---------|---|-------|-----------|---------|--------|---------|--------|
| 400 | 10 | exm807880      | 6002368   | G | 0.5538  | 0.3523  | T | 12.34 | 0.0004427 | 2.283   | 0.2367 | 1.435   | 3.63   |
| 401 | 10 | exm809549      | 12046546  | C | 0.03846 | 0.1882  | T | 15.28 | 9.25E-05  | 0.1725  | 0.4965 | 0.06519 | 0.4565 |
| 402 | 10 | exm811848      | 16877080  | C | 0       | 0.1023  | G | 14.13 | 0.0001709 | 0       | inf    | 0       | nan    |
| 403 | 10 | exm2259561     | 16903080  | C | 0.01538 | 0.1534  | T | 16.6  | 4.61E-05  | 0.08623 | 0.7427 | 0.02011 | 0.3697 |
| 404 | 10 | exm2249163     | 24489659  | G | 0.4385  | 0.2386  | A | 13.64 | 0.0002212 | 2.491   | 0.25   | 1.526   | 4.067  |
| 405 | 10 | exm2259572     | 25620487  | A | 0.3308  | 0.5227  | C | 11.18 | 0.0008289 | 0.4513  | 0.2398 | 0.282   | 0.7221 |
| 406 | 10 | exm2259581     | 31817905  | T | 0.1803  | 0.4091  | C | 17.46 | 2.93E-05  | 0.3178  | 0.281  | 0.1832  | 0.5512 |
| 407 | 10 | exm823593      | 50183042  | A | 0.1538  | 0.3352  | G | 12.84 | 0.0003385 | 0.3606  | 0.2908 | 0.2039  | 0.6376 |
| 408 | 10 | exm2271288     | 51503335  | C | 0.4048  | 0.2235  | T | 11.3  | 0.0007735 | 2.362   | 0.2585 | 1.423   | 3.921  |
| 409 | 10 | exm2267104     | 63814914  | A | 0.06154 | 0.2045  | G | 12.42 | 0.0004247 | 0.255   | 0.41   | 0.1142  | 0.5696 |
| 410 | 10 | exm2271409     | 66551141  | G | 0.06923 | 0.2102  | T | 11.64 | 0.0006463 | 0.2794  | 0.3919 | 0.1296  | 0.6024 |
| 411 | 10 | exm2271410     | 67974590  | T | 0.1016  | 0.2647  | C | 12.4  | 0.0004296 | 0.314   | 0.3404 | 0.1612  | 0.6119 |
| 412 | 10 | exm830729      | 71874784  | T | 0       | 0.08523 | C | 11.65 | 0.0006418 | 0       | inf    | 0       | nan    |
| 413 | 10 | exm-rs10999409 | 72332440  | C | 0.5077  | 0.2955  | T | 14.22 | 0.000163  | 2.459   | 0.241  | 1.533   | 3.944  |
| 414 | 10 | exm-rs588517   | 83153246  | A | 0.07692 | 0.2386  | G | 13.86 | 0.0001967 | 0.2659  | 0.3736 | 0.1278  | 0.553  |
| 415 | 10 | exm840916      | 91468925  | G | 0.1562  | 0.3276  | C | 11.4  | 0.0007356 | 0.3801  | 0.2921 | 0.2144  | 0.6739 |
| 416 | 10 | exm841012      | 91487649  | T | 0.1587  | 0.3393  | A | 12.14 | 0.0004929 | 0.3674  | 0.2932 | 0.2068  | 0.6528 |
| 417 | 10 | exm841018      | 91488979  | T | 0.1562  | 0.3314  | A | 11.8  | 0.0005925 | 0.3736  | 0.2924 | 0.2106  | 0.6627 |
| 418 | 10 | exm-rs1592051  | 93542186  | T | 0.3308  | 0.5398  | C | 13.19 | 0.0002812 | 0.4214  | 0.24   | 0.2633  | 0.6746 |
| 419 | 10 | exm844300      | 97096357  | T | 0.1385  | 0.03409 | C | 11.27 | 0.0007883 | 4.554   | 0.4869 | 1.754   | 11.82  |
| 420 | 10 | exm853997      | 105793750 | C | 0.2923  | 0.1193  | T | 14.38 | 0.0001496 | 3.049   | 0.3021 | 1.686   | 5.511  |
| 421 | 10 | exm-rs7076938  | 115789375 | C | 0.4692  | 0.2841  | T | 11.09 | 0.0008693 | 2.228   | 0.2425 | 1.385   | 3.584  |
| 422 | 10 | exm859987      | 121436286 | T | 0.06154 | 0.1932  | C | 10.94 | 0.0009398 | 0.2739  | 0.4119 | 0.1222  | 0.614  |
| 423 | 10 | exm2267137     | 124942806 | G | 0.2063  | 0.05814 | A | 15.04 | 0.0001052 | 4.212   | 0.3932 | 1.949   | 9.104  |
| 424 | 10 | exm863476      | 126715692 | T | 0.02308 | 0.1307  | C | 11.14 | 0.0008469 | 0.1571  | 0.6255 | 0.04612 | 0.5354 |
| 425 | 10 | exm2249111     | 132139508 | T | 0.3308  | 0.5398  | C | 13.19 | 0.0002812 | 0.4214  | 0.24   | 0.2633  | 0.6746 |
| 426 | 11 | exm881387      | 4791111   | C | 0.2154  | 0.07955 | T | 11.65 | 0.0006416 | 3.176   | 0.3509 | 1.597   | 6.319  |
| 427 | 11 | exm2271580     | 5193410   | C | 0.1154  | 0.2955  | T | 14.18 | 0.0001664 | 0.311   | 0.3204 | 0.166   | 0.5828 |
| 428 | 11 | exm888199      | 7727886   | T | 0.2308  | 0.4375  | C | 14.05 | 0.0001778 | 0.3857  | 0.2577 | 0.2328  | 0.6392 |
| 429 | 11 | exm2249501     | 10019879  | A | 0.1846  | 0.0625  | G | 11.01 | 0.0009075 | 3.396   | 0.3848 | 1.598   | 7.22   |
| 430 | 11 | exm890236      | 10019879  | A | 0.1846  | 0.0625  | G | 11.01 | 0.0009075 | 3.396   | 0.3848 | 1.598   | 7.22   |

|     |           |                  |                  |          |               |               |          |              |                  |               |               |               |               |
|-----|-----------|------------------|------------------|----------|---------------|---------------|----------|--------------|------------------|---------------|---------------|---------------|---------------|
| 431 | 11        | exm2267252       | 10791983         | A        | 0.05385       | 0.25          | G        | 20.71        | 5.33E-06         | 0.1707        | 0.4258        | 0.07411       | 0.3933        |
| 432 | 11        | exm-rs10741657   | 14914878         | A        | 0.3           | 0.4943        | G        | 11.66        | 0.0006398        | 0.4384        | 0.2436        | 0.272         | 0.7068        |
| 433 | 11        | exm-rs2060793    | 14915310         | A        | 0.3077        | 0.5           | G        | 11.36        | 0.0007487        | 0.4444        | 0.2426        | 0.2763        | 0.715         |
| 434 | 11        | exm2267156       | 19057767         | A        | 0.375         | 0.5747        | G        | 11.77        | 0.0006018        | 0.444         | 0.2384        | 0.2782        | 0.7085        |
| 435 | 11        | exm2271472       | 20301930         | T        | 0.2923        | 0.5341        | C        | 17.82        | 2.43E-05         | 0.3603        | 0.245         | 0.2229        | 0.5824        |
| 436 | 11        | exm2264446       | 31037514         | C        | 0.03125       | 0.1534        | A        | 12.08        | 0.0005107        | 0.178         | 0.5494        | 0.06065       | 0.5225        |
| 437 | 11        | exm2271488       | 37700681         | T        | 0.4692        | 0.2356        | G        | 18.21        | 1.98E-05         | 2.868         | 0.2506        | 1.755         | 4.687         |
| 438 | 11        | exm901458        | 43876698         | T        | 0.2462        | 0.4375        | C        | 11.94        | 0.0005501        | 0.4198        | 0.2541        | 0.2552        | 0.6907        |
| 439 | 11        | exm904624        | 47270255         | T        | 0.2385        | 0.4318        | C        | 12.29        | 0.0004547        | 0.412         | 0.256         | 0.2495        | 0.6804        |
| 440 | 11        | exm-rs7120118    | 47286290         | C        | 0.2385        | 0.4205        | T        | 10.99        | 0.0009173        | 0.4316        | 0.2563        | 0.2612        | 0.7132        |
| 441 | 11        | exm2271498       | 47290984         | G        | 0.2308        | 0.4432        | T        | 14.77        | 0.0001213        | 0.3769        | 0.2576        | 0.2275        | 0.6245        |
| 442 | 11        | exm2249889       | 47298360         | G        | 0.2692        | 0.4716        | A        | 12.92        | 0.0003244        | 0.4128        | 0.2488        | 0.2535        | 0.6722        |
| 443 | 11        | exm904958        | 47354787         | T        | 0.2231        | 0.4375        | C        | 15.18        | 9.75E-05         | 0.3692        | 0.2598        | 0.2219        | 0.6142        |
| 444 | 11        | exm905210        | 47431703         | G        | 0.06154       | 0.1932        | A        | 10.94        | 0.0009398        | 0.2739        | 0.4119        | 0.1222        | 0.614         |
| 445 | 11        | exm2267177       | 47454701         | A        | 0.2385        | 0.4318        | G        | 12.29        | 0.0004547        | 0.412         | 0.256         | 0.2495        | 0.6804        |
| 446 | 11        | exm910257        | 56756664         | G        | 0.5769        | 0.3864        | A        | 10.91        | 0.0009579        | 2.166         | 0.2355        | 1.365         | 3.436         |
| 447 | 11        | exm929809        | 66083043         | T        | 0             | 0.08235       | C        | 11.23        | 0.0008049        | 0             | inf           | 0             | nan           |
| 448 | 11        | exm936011        | 68840399         | A        | 0.2923        | 0.1092        | G        | 16.38        | 5.19E-05         | 3.37          | 0.3103        | 1.834         | 6.19          |
| 449 | 11        | exm939470        | 72946204         | T        | 0.3615        | 0.1875        | C        | 11.73        | 0.0006153        | 2.454         | 0.2657        | 1.458         | 4.131         |
| 450 | 11        | exm2271624       | 75756145         | C        | 0.05385       | 0.2159        | T        | 15.66        | 7.60E-05         | 0.2067        | 0.4296        | 0.08905       | 0.4797        |
| 451 | 11        | exm942770        | 76751166         | A        | 0.07692       | 0.2386        | G        | 13.86        | 0.0001967        | 0.2659        | 0.3736        | 0.1278        | 0.553         |
| 452 | 11        | exm2271539       | 92316799         | G        | 0.5           | 0.2955        | T        | 13.25        | 0.0002731        | 2.385         | 0.241         | 1.487         | 3.824         |
| 453 | 11        | exm950371        | 101359750        | A        | 0.06923       | 0.2216        | G        | 13.12        | 0.0002916        | 0.2613        | 0.3903        | 0.1216        | 0.5615        |
| 454 | 11        | exm950533        | 101832590        | A        | 0.08462       | 0.005747      | C        | 12.21        | 0.0004761        | 15.99         | 1.051         | 2.037         | 125.5         |
| 455 | 11        | exm950535        | 101832608        | C        | 0.08462       | 0.005682      | T        | 12.36        | 0.0004376        | 16.18         | 1.051         | 2.061         | 127           |
| 456 | 11        | exm950539        | 101832670        | A        | 0.08462       | 0.005747      | G        | 12.21        | 0.0004761        | 15.99         | 1.051         | 2.037         | 125.5         |
| 457 | <b>11</b> | <b>exm951212</b> | <b>102593248</b> | <b>T</b> | <b>0.2923</b> | <b>0.5057</b> | <b>C</b> | <b>14.02</b> | <b>0.0001807</b> | <b>0.4038</b> | <b>0.2448</b> | <b>0.2499</b> | <b>0.6523</b> |
| 458 | 11        | exm2249527       | 103779025        | G        | 0.3615        | 0.5625        | A        | 12.1         | 0.0005031        | 0.4404        | 0.2375        | 0.2765        | 0.7015        |
| 459 | 11        | exm2267223       | 109199040        | G        | 0.2846        | 0.483         | A        | 12.27        | 0.0004605        | 0.4259        | 0.246         | 0.263         | 0.6899        |
| 460 | 11        | exm957388        | 114576626        | T        | 0.1615        | 0.3294        | A        | 10.88        | 0.0009714        | 0.3922        | 0.2888        | 0.2227        | 0.6908        |
| 461 | 11        | exm-rs490592     | 116298367        | T        | 0.3077        | 0.142         | G        | 12.26        | 0.0004619        | 2.684         | 0.2876        | 1.528         | 4.717         |



|     |    |                |           |   |          |         |   |       |           |         |        |          |        |
|-----|----|----------------|-----------|---|----------|---------|---|-------|-----------|---------|--------|----------|--------|
| 462 | 11 | exm962243      | 119045951 | T | 0        | 0.07955 | C | 10.84 | 0.0009951 | 0       | inf    | 0        | nan    |
| 463 | 11 | exm-rs2126709  | 123595927 | T | 0.007692 | 0.108   | C | 12.3  | 0.0004519 | 0.06406 | 1.033  | 0.008461 | 0.485  |
| 464 | 11 | exm-rs6590330  | 128311059 | A | 0.02308  | 0.1591  | G | 15.19 | 9.71E-05  | 0.1249  | 0.6194 | 0.03708  | 0.4204 |
| 465 | 11 | exm-rs1128334  | 128328959 | A | 0.02344  | 0.1647  | G | 15.63 | 7.68E-05  | 0.1217  | 0.6197 | 0.03613  | 0.4101 |
| 466 | 11 | exm2271658     | 132320394 | T | 0.1385   | 0.3068  | C | 11.78 | 0.0005992 | 0.3631  | 0.302  | 0.2009   | 0.6563 |
| 467 | 11 | exm972168      | 134234269 | G | 0.06923  | 0       | A | 12.55 | 0.0003954 | NA      | NA     | NA       | NA     |
| 468 | 12 | exm973199      | 668548    | A | 0        | 0.07955 | G | 10.84 | 0.0009951 | 0       | inf    | 0        | nan    |
| 469 | 12 | exm977504      | 6562293   | T | 0.1846   | 0.358   | C | 11.04 | 0.0008912 | 0.4061  | 0.2754 | 0.2367   | 0.6967 |
| 470 | 12 | exm977528      | 6562823   | T | 0.2231   | 0.4148  | C | 12.36 | 0.0004376 | 0.4051  | 0.2604 | 0.2432   | 0.6749 |
| 471 | 12 | exm979034      | 6948468   | C | 0.2923   | 0.5057  | T | 14.02 | 0.0001807 | 0.4038  | 0.2448 | 0.2499   | 0.6523 |
| 472 | 12 | exm979360      | 7015707   | T | 0.1615   | 0.04545 | G | 11.74 | 0.0006102 | 4.046   | 0.4333 | 1.731    | 9.459  |
| 473 | 12 | exm2260138     | 8976780   | T | 0.1769   | 0.3523  | C | 11.46 | 0.0007112 | 0.3952  | 0.2788 | 0.2288   | 0.6826 |
| 474 | 12 | exm2267321     | 12578786  | G | 0.5615   | 0.3693  | A | 11.16 | 0.0008367 | 2.187   | 0.2359 | 1.377    | 3.472  |
| 475 | 12 | exm987235      | 14993882  | A | 0        | 0.09195 | G | 12.62 | 0.000382  | 0       | inf    | 0        | nan    |
| 476 | 12 | exm2267418     | 15750391  | G | 0.06154  | 0.1989  | A | 11.67 | 0.0006335 | 0.2642  | 0.4109 | 0.1181   | 0.5911 |
| 477 | 12 | exm988079      | 18649057  | T | 0.2154   | 0.4138  | C | 13.27 | 0.0002698 | 0.3889  | 0.2631 | 0.2322   | 0.6513 |
| 478 | 12 | exm988131      | 18719972  | G | 0.03125  | 0.1488  | T | 11.36 | 0.00075   | 0.1845  | 0.5523 | 0.0625   | 0.5447 |
| 479 | 12 | exm2271825     | 19028431  | C | 0.5469   | 0.3529  | T | 11.17 | 0.0008327 | 2.213   | 0.2393 | 1.384    | 3.537  |
| 480 | 12 | exm989495      | 21713402  | T | 0.4766   | 0.2443  | C | 17.76 | 2.51E-05  | 2.816   | 0.2492 | 1.728    | 4.589  |
| 481 | 12 | exm993136      | 32137512  | G | 0.1      | 0.25    | C | 11.1  | 0.0008637 | 0.3333  | 0.3403 | 0.1711   | 0.6494 |
| 482 | 12 | exm2250923     | 39508651  | T | 0.5846   | 0.358   | C | 15.5  | 8.27E-05  | 2.524   | 0.2375 | 1.585    | 4.021  |
| 483 | 12 | exm2271838     | 43258744  | T | 0.1154   | 0.2955  | C | 14.18 | 0.0001664 | 0.311   | 0.3204 | 0.166    | 0.5828 |
| 484 | 12 | exm-rs17291650 | 51213433  | G | 0.05385  | 0.2045  | A | 14.06 | 0.0001771 | 0.2213  | 0.4312 | 0.09506  | 0.5153 |
| 485 | 12 | exm1003138     | 51681903  | T | 0.2      | 0.05114 | C | 16.36 | 5.25E-05  | 4.639   | 0.4064 | 2.092    | 10.29  |
| 486 | 12 | exm1003199     | 51707626  | T | 0.2077   | 0.06897 | C | 12.8  | 0.0003457 | 3.539   | 0.3691 | 1.717    | 7.296  |
| 487 | 12 | exm1006180     | 53044267  | T | 0.4231   | 0.2386  | C | 11.75 | 0.000609  | 2.34    | 0.2506 | 1.432    | 3.823  |
| 488 | 12 | exm1010338     | 55523587  | A | 0.4769   | 0.2784  | T | 12.75 | 0.0003566 | 2.363   | 0.2431 | 1.467    | 3.806  |
| 489 | 12 | exm1010343     | 55523685  | T | 0.4769   | 0.2816  | C | 12.24 | 0.0004666 | 2.326   | 0.2434 | 1.443    | 3.748  |
| 490 | 12 | exm1010354     | 55523860  | C | 0.4769   | 0.2784  | A | 12.75 | 0.0003566 | 2.363   | 0.2431 | 1.467    | 3.806  |
| 491 | 12 | exm1010375     | 55524172  | A | 0.4769   | 0.2784  | G | 12.75 | 0.0003566 | 2.363   | 0.2431 | 1.467    | 3.806  |
| 492 | 12 | exm1010442     | 55641075  | G | 0.4538   | 0.2614  | A | 12.29 | 0.0004552 | 2.348   | 0.2459 | 1.45     | 3.803  |

|     |    |                |           |   |          |         |   |       |           |         |        |          |        |
|-----|----|----------------|-----------|---|----------|---------|---|-------|-----------|---------|--------|----------|--------|
| 493 | 12 | exm1010452     | 55641295  | G | 0.4538   | 0.2614  | A | 12.29 | 0.0004552 | 2.348   | 0.2459 | 1.45     | 3.803  |
| 494 | 12 | exm1010453     | 55641328  | A | 0.4538   | 0.2614  | G | 12.29 | 0.0004552 | 2.348   | 0.2459 | 1.45     | 3.803  |
| 495 | 12 | exm-rs12367822 | 57204160  | T | 0.3492   | 0.175   | G | 11.36 | 0.0007519 | 2.53    | 0.2797 | 1.462    | 4.376  |
| 496 | 12 | exm2271850     | 69842643  | C | 0.2538   | 0.4432  | T | 11.6  | 0.0006612 | 0.4274  | 0.2523 | 0.2607   | 0.7008 |
| 497 | 12 | exm2264475     | 70728679  | C | 0.6      | 0.4091  | A | 10.9  | 0.0009592 | 2.167   | 0.2357 | 1.365    | 3.439  |
| 498 | 12 | exm2271753     | 72609368  | C | 0.3077   | 0.5227  | T | 14.1  | 0.0001738 | 0.4058  | 0.2427 | 0.2522   | 0.6529 |
| 499 | 12 | exm2271867     | 108894909 | C | 0.3231   | 0.6118  | T | 24.58 | 7.15E-07  | 0.3029  | 0.2448 | 0.1874   | 0.4894 |
| 500 | 12 | exm1035335     | 109826634 | A | 0.3      | 0.1207  | C | 15.1  | 0.0001019 | 3.122   | 0.3013 | 1.73     | 5.636  |
| 501 | 12 | exm2259971     | 118889488 | G | 0.1692   | 0.3977  | T | 18.57 | 1.64E-05  | 0.3085  | 0.2801 | 0.1782   | 0.5341 |
| 502 | 12 | exm1042101     | 119772991 | C | 0        | 0.1023  | G | 14.13 | 0.0001709 | 0       | inf    | 0        | nan    |
| 503 | 12 | exm1047380     | 123466304 | G | 0.007692 | 0.1023  | A | 11.49 | 0.0007015 | 0.06804 | 1.034  | 0.008963 | 0.5166 |
| 504 | 12 | exm1048951     | 124352505 | A | 0        | 0.1307  | T | 18.37 | 1.82E-05  | 0       | inf    | 0        | nan    |
| 505 | 12 | exm1048970     | 124358121 | G | 0        | 0.1307  | A | 18.37 | 1.82E-05  | 0       | inf    | 0        | nan    |
| 506 | 12 | exm1052962     | 132549264 | T | 0        | 0.08235 | C | 11.23 | 0.0008049 | 0       | inf    | 0        | nan    |
| 507 | 13 | exm1056554     | 23824818  | A | 0.2692   | 0.1193  | G | 11.24 | 0.000801  | 2.719   | 0.3052 | 1.495    | 4.946  |
| 508 | 13 | exm1060035     | 28626716  | T | 0        | 0.07955 | C | 10.84 | 0.0009951 | 0       | inf    | 0        | nan    |
| 509 | 13 | exm1064919     | 40229891  | A | 0.5312   | 0.2907  | G | 17.8  | 2.46E-05  | 2.765   | 0.2441 | 1.714    | 4.462  |
| 510 | 13 | exm1064923     | 40229957  | A | 0.5308   | 0.2955  | T | 17.32 | 3.16E-05  | 2.697   | 0.2412 | 1.681    | 4.328  |
| 511 | 13 | exm1065549     | 41835039  | C | 0.06923  | 0.2159  | T | 12.37 | 0.0004353 | 0.2701  | 0.3911 | 0.1255   | 0.5813 |
| 512 | 13 | exm2271966     | 81260479  | T | 0.5308   | 0.3239  | C | 13.22 | 0.0002777 | 2.362   | 0.2384 | 1.48     | 3.768  |
| 513 | 13 | exm-rs2762111  | 94051114  | A | 0.3308   | 0.5341  | G | 12.5  | 0.0004068 | 0.4312  | 0.24   | 0.2694   | 0.6901 |
| 514 | 13 | exm2267623     | 106266101 | A | 0.09483  | 0.2534  | G | 10.87 | 0.0009798 | 0.3086  | 0.3696 | 0.1496   | 0.6369 |
| 515 | 14 | exm2272151     | 20818131  | C | 0.1077   | 0.2898  | T | 14.82 | 0.0001184 | 0.2958  | 0.3281 | 0.1555   | 0.5627 |
| 516 | 14 | exm2264539     | 22974256  | A | 0.2      | 0.3977  | C | 13.58 | 0.0002289 | 0.3786  | 0.2679 | 0.2239   | 0.6401 |
| 517 | 14 | exm1091429     | 24114483  | C | 0.007692 | 0.1023  | T | 11.49 | 0.0007015 | 0.06804 | 1.034  | 0.008963 | 0.5166 |
| 518 | 14 | exm2251731     | 24901433  | T | 0.1      | 0.2898  | C | 16.28 | 5.46E-05  | 0.2723  | 0.3363 | 0.1409   | 0.5264 |
| 519 | 14 | exm2267701     | 30312091  | A | 0.3692   | 0.5795  | G | 13.23 | 0.0002749 | 0.4247  | 0.2374 | 0.2667   | 0.6763 |
| 520 | 14 | exm2260309     | 33956209  | A | 0.1077   | 0.2614  | C | 11.2  | 0.0008173 | 0.3411  | 0.3309 | 0.1783   | 0.6524 |
| 521 | 14 | exm2272064     | 33979974  | C | 0.5615   | 0.3636  | T | 11.84 | 0.0005787 | 2.241   | 0.2362 | 1.411    | 3.561  |
| 522 | 14 | exm2260328     | 48997206  | C | 0.2734   | 0.4651  | T | 11.41 | 0.000732  | 0.4328  | 0.2504 | 0.2649   | 0.707  |
| 523 | 14 | exm1100197     | 50583083  | T | 0.04762  | 0.2176  | G | 16.85 | 4.05E-05  | 0.1797  | 0.4578 | 0.07328  | 0.4408 |

|     |    |                |           |   |         |         |   |       |           |        |        |         |        |
|-----|----|----------------|-----------|---|---------|---------|---|-------|-----------|--------|--------|---------|--------|
| 524 | 14 | exm-rs1265879  | 50877983  | A | 0.3846  | 0.2011  | G | 12.43 | 0.0004216 | 2.482  | 0.2613 | 1.487   | 4.142  |
| 525 | 14 | exm2272106     | 70591661  | C | 0.3154  | 0.5795  | T | 20.96 | 4.69E-06  | 0.3342 | 0.2428 | 0.2077  | 0.5379 |
| 526 | 14 | exm-rs221901   | 71602226  | G | 0.5308  | 0.3125  | A | 14.78 | 0.0001208 | 2.489  | 0.2394 | 1.556   | 3.979  |
| 527 | 14 | exml1112651    | 73440864  | C | 0.5462  | 0.3295  | T | 14.39 | 0.0001488 | 2.448  | 0.2382 | 1.535   | 3.905  |
| 528 | 14 | exm2251917     | 73440864  | C | 0.5462  | 0.3295  | T | 14.39 | 0.0001488 | 2.448  | 0.2382 | 1.535   | 3.905  |
| 529 | 14 | exml1113028    | 73727509  | T | 0.5     | 0.2898  | G | 14.04 | 0.000179  | 2.451  | 0.2416 | 1.526   | 3.936  |
| 530 | 14 | exml1113341    | 73964964  | T | 0       | 0.1534  | C | 21.87 | 2.91E-06  | 0      | inf    | 0       | nan    |
| 531 | 14 | exml1113345    | 73965778  | A | 0       | 0.07955 | G | 10.84 | 0.0009951 | 0      | inf    | 0       | nan    |
| 532 | 14 | exml1113408    | 73985794  | C | 0       | 0.1307  | G | 18.37 | 1.82E-05  | 0      | inf    | 0       | nan    |
| 533 | 14 | exml1114149    | 74428445  | A | 0.5231  | 0.3239  | G | 12.28 | 0.0004577 | 2.29   | 0.2383 | 1.435   | 3.653  |
| 534 | 14 | exml1114232    | 74489695  | T | 0       | 0.1     | G | 13.55 | 0.0002319 | 0      | inf    | 0       | nan    |
| 535 | 14 | exm-rs8014204  | 75322794  | G | 0.4538  | 0.25    | A | 13.91 | 0.0001914 | 2.493  | 0.2477 | 1.534   | 4.051  |
| 536 | 14 | exm2251934     | 75347585  | C | 0.6231  | 0.3977  | A | 15.19 | 9.72E-05  | 2.503  | 0.2376 | 1.571   | 3.988  |
| 537 | 14 | exml120001     | 89205265  | C | 0.03226 | 0.1647  | T | 12.97 | 0.0003169 | 0.169  | 0.5487 | 0.05767 | 0.4955 |
| 538 | 14 | exm-rs17776811 | 90066451  | A | 0.3462  | 0.5455  | C | 11.95 | 0.0005455 | 0.4412 | 0.2385 | 0.2764  | 0.7041 |
| 539 | 14 | exml121075     | 91739081  | A | 0.04615 | 0.233   | G | 20.07 | 7.47E-06  | 0.1593 | 0.4545 | 0.06538 | 0.3883 |
| 540 | 14 | exm2252002     | 93138041  | C | 0.5692  | 0.358   | T | 13.5  | 0.0002388 | 2.37   | 0.2368 | 1.49    | 3.77   |
| 541 | 14 | exml126941     | 100625902 | C | 0.5083  | 0.3125  | T | 10.99 | 0.0009157 | 2.275  | 0.2499 | 1.394   | 3.712  |
| 542 | 14 | exml127228     | 100847707 | A | 0.1846  | 0.3864  | G | 14.47 | 0.0001421 | 0.3596 | 0.274  | 0.2102  | 0.6152 |
| 543 | 14 | exm-rs730570   | 101142890 | G | 0.1692  | 0.3409  | A | 11.23 | 0.000803  | 0.3938 | 0.2828 | 0.2262  | 0.6856 |
| 544 | 14 | exm2272147     | 104704722 | C | 0.5769  | 0.3352  | T | 17.75 | 2.53E-05  | 2.704  | 0.2388 | 1.694   | 4.318  |
| 545 | 15 | exml144235     | 30018627  | C | 0.1328  | 0.3068  | T | 12.53 | 0.0003995 | 0.346  | 0.3075 | 0.1894  | 0.6322 |
| 546 | 15 | exml169547     | 65235776  | G | 0.5308  | 0.3409  | A | 11.05 | 0.0008854 | 2.187  | 0.237  | 1.374   | 3.48   |
| 547 | 15 | exml172611     | 68624396  | A | 0.04615 | 0.233   | C | 20.07 | 7.47E-06  | 0.1593 | 0.4545 | 0.06538 | 0.3883 |
| 548 | 15 | exml172631     | 68628163  | T | 0       | 0.09091 | C | 12.47 | 0.0004135 | 0      | inf    | 0       | nan    |
| 549 | 15 | exm-rs2472299  | 75033400  | A | 0.2308  | 0.4148  | G | 11.34 | 0.0007598 | 0.4233 | 0.2583 | 0.2551  | 0.7023 |
| 550 | 15 | exm-rs2472304  | 75044238  | A | 0.5462  | 0.3182  | G | 16.01 | 6.31E-05  | 2.579  | 0.2392 | 1.614   | 4.121  |
| 551 | 15 | exm2267788     | 75052994  | A | 0.3308  | 0.5795  | G | 18.56 | 1.65E-05  | 0.3586 | 0.241  | 0.2236  | 0.575  |
| 552 | 15 | exm-rs1378942  | 75077367  | T | 0.5462  | 0.3352  | G | 13.61 | 0.0002245 | 2.386  | 0.2378 | 1.497   | 3.803  |
| 553 | 15 | exm-rs6495122  | 75125645  | C | 0.4692  | 0.2784  | A | 11.82 | 0.0005846 | 2.291  | 0.2432 | 1.422   | 3.691  |
| 554 | 15 | exml182735     | 81624768  | C | 0.1154  | 0.02273 | T | 11.02 | 0.0008999 | 5.609  | 0.5755 | 1.816   | 17.33  |

|     |    |                |           |   |         |          |   |       |           |        |        |         |        |
|-----|----|----------------|-----------|---|---------|----------|---|-------|-----------|--------|--------|---------|--------|
| 555 | 15 | exml1183569    | 83499472  | T | 0       | 0.08523  | C | 11.65 | 0.0006418 | 0      | inf    | 0       | nan    |
| 556 | 15 | exml1193919    | 101561275 | T | 0.1     | 0.005682 | C | 15.24 | 9.49E-05  | 19.44  | 1.045  | 2.51    | 150.6  |
| 557 | 16 | exml1204207    | 2017804   | G | 0       | 0.07955  | T | 10.84 | 0.0009951 | 0      | inf    | 0       | nan    |
| 558 | 16 | exml1204849    | 2070568   | C | 0.3923  | 0.2159   | A | 11.28 | 0.0007834 | 2.344  | 0.2566 | 1.418   | 3.876  |
| 559 | 16 | exml1216236    | 8839954   | A | 0.5923  | 0.375    | G | 14.18 | 0.0001658 | 2.421  | 0.2368 | 1.522   | 3.852  |
| 560 | 16 | exm2272419     | 10434389  | C | 0.1     | 0.2784   | T | 14.73 | 0.000124  | 0.288  | 0.3373 | 0.1487  | 0.5578 |
| 561 | 16 | exm2252439     | 13090833  | C | 0.5769  | 0.3466   | A | 16.07 | 6.12E-05  | 2.571  | 0.2379 | 1.613   | 4.098  |
| 562 | 16 | exm-rs153091   | 13253956  | C | 0.2462  | 0.09659  | A | 12.44 | 0.000421  | 3.054  | 0.3264 | 1.611   | 5.791  |
| 563 | 16 | exml1222920    | 20441020  | A | 0.06923 | 0.2159   | G | 12.37 | 0.0004353 | 0.2701 | 0.3911 | 0.1255  | 0.5813 |
| 564 | 16 | exml1223367    | 20748331  | A | 0.3615  | 0.1705   | C | 14.5  | 0.0001403 | 2.756  | 0.2711 | 1.62    | 4.688  |
| 565 | 16 | exml1223535    | 20810266  | C | 0.2769  | 0.1023   | T | 15.69 | 7.45E-05  | 3.362  | 0.3167 | 1.807   | 6.254  |
| 566 | 16 | exml1226195    | 23409440  | A | 0.1769  | 0.03409  | G | 17.78 | 2.48E-05  | 6.09   | 0.4747 | 2.402   | 15.44  |
| 567 | 16 | exml1227682    | 24902299  | G | 0       | 0.07955  | C | 10.84 | 0.0009951 | 0      | inf    | 0       | nan    |
| 568 | 16 | exm2252528     | 27113695  | T | 0.3154  | 0.517    | C | 12.4  | 0.0004302 | 0.4303 | 0.2416 | 0.268   | 0.6909 |
| 569 | 16 | exm2252541     | 29043450  | T | 0.2923  | 0.483    | G | 11.31 | 0.0007729 | 0.4422 | 0.2448 | 0.2737  | 0.7145 |
| 570 | 16 | exml1236395    | 31374535  | G | 0.5308  | 0.3125   | C | 14.78 | 0.0001208 | 2.489  | 0.2394 | 1.556   | 3.979  |
| 571 | 16 | exm2225334     | 74481327  | C | 0.1077  | 0.005682 | T | 16.69 | 4.40E-05  | 21.12  | 1.042  | 2.74    | 162.8  |
| 572 | 16 | exml1261911    | 81232564  | T | 0.1077  | 0.2784   | G | 13.33 | 0.0002614 | 0.3128 | 0.3291 | 0.1641  | 0.5963 |
| 573 | 17 | exml1273421    | 648186    | G | 0.1538  | 0.3523   | A | 15.01 | 0.0001071 | 0.3343 | 0.2898 | 0.1894  | 0.59   |
| 574 | 17 | exml1286675    | 7224921   | G | 0.06923 | 0.2159   | C | 12.37 | 0.0004353 | 0.2701 | 0.3911 | 0.1255  | 0.5813 |
| 575 | 17 | exml1287293    | 7329134   | A | 0.3077  | 0.1193   | G | 16.62 | 4.56E-05  | 3.28   | 0.3003 | 1.821   | 5.909  |
| 576 | 17 | exml1291491    | 8135444   | G | 0.1385  | 0.02841  | C | 13.03 | 0.0003069 | 5.496  | 0.5199 | 1.984   | 15.23  |
| 577 | 17 | exml1291535    | 8138569   | G | 0.1385  | 0.02273  | C | 15.01 | 0.000107  | 6.911  | 0.5659 | 2.279   | 20.95  |
| 578 | 17 | exml1291696    | 8166458   | A | 0.1385  | 0.03409  | T | 11.27 | 0.0007883 | 4.554  | 0.4869 | 1.754   | 11.82  |
| 579 | 17 | exml1291833    | 8172506   | G | 0.2385  | 0.05114  | T | 23.09 | 1.55E-06  | 5.81   | 0.3993 | 2.656   | 12.71  |
| 580 | 17 | exm2253321     | 8215927   | T | 0.1077  | 0.01724  | C | 11.53 | 0.0006845 | 6.879  | 0.6475 | 1.934   | 24.47  |
| 581 | 17 | exml1292049    | 8224276   | T | 0.1769  | 0.3693   | C | 13.51 | 0.0002374 | 0.3671 | 0.2779 | 0.2129  | 0.6328 |
| 582 | 17 | exml1312892    | 34077232  | A | 0.03846 | 0.1761   | G | 13.65 | 0.0002199 | 0.1871 | 0.4971 | 0.07061 | 0.4957 |
| 583 | 17 | exm-rs16965350 | 36614563  | T | 0.1385  | 0.3182   | C | 13.17 | 0.0002842 | 0.3444 | 0.3011 | 0.1909  | 0.6214 |
| 584 | 17 | exml1315705    | 36889559  | T | 0.2385  | 0.09659  | C | 11.38 | 0.0007428 | 2.929  | 0.3278 | 1.54    | 5.568  |
| 585 | 17 | exml1315976    | 37054772  | T | 0.5154  | 0.3068   | C | 13.61 | 0.0002255 | 2.403  | 0.2398 | 1.502   | 3.844  |

|     |    |                |          |   |         |         |   |       |           |        |        |         |        |
|-----|----|----------------|----------|---|---------|---------|---|-------|-----------|--------|--------|---------|--------|
| 586 | 17 | exml1316097    | 37224211 | T | 0.1692  | 0.03409 | C | 16.43 | 5.06E-05  | 5.772  | 0.4767 | 2.267   | 14.69  |
| 587 | 17 | exml1317944    | 38189659 | T | 0       | 0.09659 | C | 13.3  | 0.0002661 | 0      | inf    | 0       | nan    |
| 588 | 17 | exml2252979    | 38243103 | T | 0       | 0.108   | C | 14.96 | 0.0001096 | 0      | inf    | 0       | nan    |
| 589 | 17 | exml1338031    | 51901643 | C | 0.06154 | 0.1932  | T | 10.94 | 0.0009398 | 0.2739 | 0.4119 | 0.1222  | 0.614  |
| 590 | 17 | exml1338036    | 51901703 | C | 0.05385 | 0.1875  | G | 11.75 | 0.000607  | 0.2466 | 0.4339 | 0.1054  | 0.5773 |
| 591 | 17 | exml1339358    | 56270442 | G | 0.09231 | 0.01136 | A | 11.22 | 0.0008087 | 8.847  | 0.773  | 1.945   | 40.25  |
| 592 | 17 | exml1348365    | 66364804 | C | 0.4692  | 0.2841  | T | 11.09 | 0.0008693 | 2.228  | 0.2425 | 1.385   | 3.584  |
| 593 | 17 | exml1354846    | 73570718 | G | 0.1308  | 0.3068  | C | 13.01 | 0.0003106 | 0.3399 | 0.3072 | 0.1861  | 0.6207 |
| 594 | 17 | exml1358102    | 74381555 | A | 0.3769  | 0.1724  | G | 16.18 | 5.76E-05  | 2.904  | 0.2702 | 1.71    | 4.932  |
| 595 | 17 | exml1358104    | 74381567 | G | 0.0678  | 0.2529  | A | 16.38 | 5.17E-05  | 0.2148 | 0.4065 | 0.09684 | 0.4765 |
| 596 | 17 | exml1358199    | 74387284 | T | 0.4692  | 0.2614  | C | 14.21 | 0.0001637 | 2.498  | 0.2456 | 1.544   | 4.043  |
| 597 | 17 | exml1359079    | 74878259 | A | 0.1231  | 0.3693  | G | 23.29 | 1.39E-06  | 0.2397 | 0.3093 | 0.1307  | 0.4394 |
| 598 | 17 | exml1360583    | 76433899 | A | 0.2769  | 0.108   | G | 14.48 | 0.0001417 | 3.165  | 0.3121 | 1.717   | 5.834  |
| 599 | 17 | exml1364139    | 78272294 | T | 0.06154 | 0.2159  | C | 13.95 | 0.0001877 | 0.2381 | 0.4084 | 0.107   | 0.5302 |
| 600 | 17 | exml-rs1046896 | 80685533 | T | 0.2538  | 0.4545  | C | 12.93 | 0.0003232 | 0.4082 | 0.252  | 0.2491  | 0.6691 |
| 601 | 17 | exml1371159    | 81043175 | T | 0       | 0.108   | G | 14.96 | 0.0001096 | 0      | inf    | 0       | nan    |
| 602 | 18 | exml-rs991014  | 42439886 | A | 0.3462  | 0.1591  | G | 14.4  | 0.0001475 | 2.798  | 0.2765 | 1.628   | 4.811  |
| 603 | 18 | exml1391359    | 61654463 | A | 0.3462  | 0.5465  | G | 11.96 | 0.0005423 | 0.4393 | 0.2397 | 0.2746  | 0.7027 |
| 604 | 18 | exml1392902    | 72343292 | A | 0       | 0.09412 | T | 12.92 | 0.0003243 | 0      | inf    | 0       | nan    |
| 605 | 19 | exml1397560    | 830820   | A | 0.1308  | 0.01705 | G | 15.83 | 6.93E-05  | 8.676  | 0.6378 | 2.485   | 30.28  |
| 606 | 19 | exml2253724    | 2079299  | G | 0.3462  | 0.5941  | A | 18.13 | 2.06E-05  | 0.3617 | 0.2416 | 0.2252  | 0.5808 |
| 607 | 19 | exml-rs7248104 | 7224431  | A | 0.5615  | 0.3466  | G | 14.03 | 0.0001794 | 2.414  | 0.2373 | 1.516   | 3.845  |
| 608 | 19 | exml1420079    | 8993018  | A | 0.1385  | 0.03409 | G | 11.27 | 0.0007883 | 4.554  | 0.4869 | 1.754   | 11.82  |
| 609 | 19 | exml1420234    | 9003645  | A | 0.2769  | 0.09659 | G | 16.98 | 3.78E-05  | 3.582  | 0.3218 | 1.907   | 6.73   |
| 610 | 19 | exml1422035    | 9086012  | G | 0.06154 | 0       | T | 11.12 | 0.0008533 | NA     | NA     | NA      | NA     |
| 611 | 19 | exml2272761    | 9945354  | C | 0.2923  | 0.5227  | T | 16.25 | 5.56E-05  | 0.3771 | 0.2449 | 0.2334  | 0.6094 |
| 612 | 19 | exml1423637    | 9968434  | T | 0.4923  | 0.2898  | C | 13.08 | 0.0002992 | 2.377  | 0.2416 | 1.48    | 3.816  |
| 613 | 19 | exml1436482    | 15198441 | T | 0.04615 | 0.2102  | G | 16.67 | 4.46E-05  | 0.1818 | 0.4571 | 0.07421 | 0.4453 |
| 614 | 19 | exml1436497    | 15198606 | T | 0.04615 | 0.2102  | C | 16.67 | 4.46E-05  | 0.1818 | 0.4571 | 0.07421 | 0.4453 |
| 615 | 19 | exml1436499    | 15198631 | A | 0.2538  | 0.4489  | C | 12.25 | 0.0004641 | 0.4177 | 0.2522 | 0.2548  | 0.6847 |
| 616 | 19 | exml1436508    | 15198751 | C | 0.04615 | 0.2102  | T | 16.67 | 4.46E-05  | 0.1818 | 0.4571 | 0.07421 | 0.4453 |

|     |    |               |          |   |         |         |   |       |           |         |        |         |        |
|-----|----|---------------|----------|---|---------|---------|---|-------|-----------|---------|--------|---------|--------|
| 617 | 19 | exm2272822    | 16808183 | C | 0.1769  | 0.4148  | T | 19.65 | 9.32E-06  | 0.3033  | 0.2761 | 0.1765  | 0.521  |
| 618 | 19 | exm1440719    | 17036087 | T | 0.01538 | 0.1477  | C | 15.75 | 7.22E-05  | 0.09014 | 0.7436 | 0.02099 | 0.3872 |
| 619 | 19 | exm1441188    | 17303774 | T | 0.6154  | 0.358   | G | 19.91 | 8.14E-06  | 2.87    | 0.2392 | 1.796   | 4.586  |
| 620 | 19 | exm2272823    | 17958777 | C | 0.05385 | 0.1818  | T | 11.01 | 0.0009057 | 0.2561  | 0.435  | 0.1092  | 0.6007 |
| 621 | 19 | exm1446569    | 19121084 | C | 0       | 0.08523 | T | 11.65 | 0.0006418 | 0       | inf    | 0       | nan    |
| 622 | 19 | exm2260841    | 22522950 | G | 0.1231  | 0.358   | A | 21.54 | 3.47E-06  | 0.2517  | 0.3098 | 0.1372  | 0.462  |
| 623 | 19 | exm2272797    | 48215633 | C | 0.2188  | 0.4034  | T | 11.51 | 0.0006935 | 0.4141  | 0.2633 | 0.2472  | 0.6938 |
| 624 | 19 | exm1486034    | 48543906 | C | 0.07692 | 0.2216  | G | 11.64 | 0.000647  | 0.2927  | 0.3759 | 0.1401  | 0.6115 |
| 625 | 19 | exm1487912    | 49206985 | G | 0.3462  | 0.5568  | A | 13.33 | 0.0002612 | 0.4214  | 0.2388 | 0.2639  | 0.6728 |
| 626 | 19 | exm-rs504963  | 49208865 | C | 0.3231  | 0.5517  | T | 15.69 | 7.45E-05  | 0.3878  | 0.2417 | 0.2415  | 0.6227 |
| 627 | 19 | exm1488777    | 49409026 | A | 0.06923 | 0       | G | 12.55 | 0.0003954 | NA      | NA     | NA      | NA     |
| 628 | 19 | exm1494168    | 50905310 | A | 0       | 0.108   | G | 14.96 | 0.0001096 | 0       | inf    | 0       | nan    |
| 629 | 19 | exm2253947    | 50912126 | A | 0       | 0.108   | G | 14.96 | 0.0001096 | 0       | inf    | 0       | nan    |
| 630 | 19 | exm1494630    | 50971009 | A | 0       | 0.1307  | C | 18.37 | 1.82E-05  | 0       | inf    | 0       | nan    |
| 631 | 19 | exm1497848    | 52223121 | A | 0.2615  | 0.4545  | G | 11.92 | 0.0005566 | 0.425   | 0.2505 | 0.2601  | 0.6944 |
| 632 | 19 | exm1497888    | 52249672 | A | 0.5     | 0.3068  | C | 11.74 | 0.0006112 | 2.259   | 0.2398 | 1.412   | 3.615  |
| 633 | 19 | exm-rs7507442 | 53278953 | A | 0.3615  | 0.6193  | G | 19.88 | 8.24E-06  | 0.3481  | 0.2396 | 0.2176  | 0.5567 |
| 634 | 19 | exm1501784    | 54080067 | C | 0.06154 | 0.233   | T | 16.34 | 5.30E-05  | 0.2159  | 0.4062 | 0.09739 | 0.4787 |
| 635 | 19 | exm-rs400322  | 55172578 | A | 0.2769  | 0.483   | G | 13.28 | 0.0002687 | 0.41    | 0.2473 | 0.2525  | 0.6658 |
| 636 | 19 | exm1510830    | 56477710 | T | 0.4462  | 0.25    | C | 12.95 | 0.0003206 | 2.417   | 0.2479 | 1.487   | 3.928  |
| 637 | 19 | exm1510859    | 56487603 | A | 0.5385  | 0.3352  | G | 12.67 | 0.0003725 | 2.314   | 0.2376 | 1.452   | 3.686  |
| 638 | 20 | exm1517622    | 139456   | A | 0.1769  | 0.3636  | G | 12.81 | 0.0003447 | 0.3762  | 0.2782 | 0.2181  | 0.6489 |
| 639 | 20 | exm1517629    | 139576   | A | 0.1769  | 0.3636  | C | 12.81 | 0.0003447 | 0.3762  | 0.2782 | 0.2181  | 0.6489 |
| 640 | 20 | exm1517645    | 168728   | T | 0.1769  | 0.3864  | A | 15.7  | 7.43E-05  | 0.3414  | 0.2771 | 0.1983  | 0.5877 |
| 641 | 20 | exm2254185    | 210061   | A | 0.2615  | 0.483   | G | 15.42 | 8.59E-05  | 0.3792  | 0.2502 | 0.2322  | 0.6191 |
| 642 | 20 | exm-rs3761218 | 3776175  | T | 0.5846  | 0.3851  | C | 11.89 | 0.000563  | 2.248   | 0.2365 | 1.414   | 3.573  |
| 643 | 20 | exm2272875    | 7482971  | T | 0.2846  | 0.4886  | C | 12.95 | 0.0003204 | 0.4164  | 0.246  | 0.2571  | 0.6743 |
| 644 | 20 | exm-rs6056209 | 8836771  | G | 0.3923  | 0.5909  | A | 11.8  | 0.0005927 | 0.4469  | 0.2362 | 0.2813  | 0.71   |
| 645 | 20 | exm-rs4141463 | 14747471 | C | 0.3125  | 0.5059  | T | 11.19 | 0.0008226 | 0.444   | 0.2447 | 0.2748  | 0.7173 |
| 646 | 20 | exm2254184    | 20817745 | G | 0.3     | 0.5114  | A | 13.7  | 0.0002146 | 0.4095  | 0.2437 | 0.254   | 0.6602 |
| 647 | 20 | exm1540821    | 37396120 | G | 0.6     | 0.392   | A | 12.95 | 0.0003193 | 2.326   | 0.2364 | 1.464   | 3.697  |

|     |    |                |           |   |          |         |   |       |           |         |        |          |        |
|-----|----|----------------|-----------|---|----------|---------|---|-------|-----------|---------|--------|----------|--------|
| 648 | 20 | exm2268297     | 40783392  | G | 0.5769   | 0.3864  | A | 10.91 | 0.0009579 | 2.166   | 0.2355 | 1.365    | 3.436  |
| 649 | 20 | exm-rs13038095 | 46425576  | T | 0.2154   | 0.0625  | G | 15.72 | 7.36E-05  | 4.118   | 0.3775 | 1.965    | 8.629  |
| 650 | 20 | exm2260952     | 52019450  | T | 0.06923  | 0.2102  | C | 11.64 | 0.0006463 | 0.2794  | 0.3919 | 0.1296   | 0.6024 |
| 651 | 20 | exm1554440     | 58576432  | G | 0        | 0.07955 | A | 10.84 | 0.0009951 | 0       | inf    | 0        | nan    |
| 652 | 20 | exm2254385     | 61990939  | A | 0.2385   | 0.08523 | G | 13.75 | 0.0002093 | 3.361   | 0.3395 | 1.728    | 6.538  |
| 653 | 21 | exm2254497     | 19220798  | C | 0.5846   | 0.3693  | T | 13.95 | 0.0001878 | 2.403   | 0.2368 | 1.511    | 3.823  |
| 654 | 21 | exm-rs1475591  | 32440540  | T | 0.06923  | 0.2216  | C | 13.12 | 0.0002916 | 0.2613  | 0.3903 | 0.1216   | 0.5615 |
| 655 | 21 | exm-rs2833256  | 32444485  | A | 0.04615  | 0.2069  | G | 16.15 | 5.86E-05  | 0.1855  | 0.458  | 0.07559  | 0.4551 |
| 656 | 21 | exm1574967     | 44837555  | G | 0.0625   | 0.2093  | A | 12.64 | 0.0003783 | 0.2519  | 0.4104 | 0.1127   | 0.563  |
| 657 | 21 | exm1576150     | 45564766  | G | 0.01538  | 0.1534  | C | 16.6  | 4.61E-05  | 0.08623 | 0.7427 | 0.02011  | 0.3697 |
| 658 | 21 | exm1576957     | 45819296  | C | 0        | 0.1034  | T | 14.29 | 0.0001563 | 0       | inf    | 0        | nan    |
| 659 | 21 | exm2272989     | 46334472  | T | 0.5692   | 0.3693  | C | 12.05 | 0.0005169 | 2.257   | 0.2361 | 1.421    | 3.585  |
| 660 | 22 | exm1586012     | 19961730  | A | 0.007692 | 0.125   | G | 14.8  | 0.0001194 | 0.05426 | 1.029  | 0.007216 | 0.4081 |
| 661 | 22 | exm2268401     | 20127554  | G | 0.2846   | 0.4886  | A | 12.95 | 0.0003204 | 0.4164  | 0.246  | 0.2571   | 0.6743 |
| 662 | 22 | exm1596199     | 26695077  | T | 0.2308   | 0.4148  | G | 11.34 | 0.0007598 | 0.4233  | 0.2583 | 0.2551   | 0.7023 |
| 663 | 22 | exm1598396     | 29913272  | T | 0.5615   | 0.358   | C | 12.55 | 0.000396  | 2.297   | 0.2366 | 1.445    | 3.652  |
| 664 | 22 | exm1599866     | 30934816  | T | 0.1308   | 0.3125  | C | 13.72 | 0.0002117 | 0.331   | 0.3068 | 0.1814   | 0.6039 |
| 665 | 22 | exm1606293     | 37906262  | T | 0.3308   | 0.1529  | C | 13.15 | 0.0002869 | 2.737   | 0.2831 | 1.572    | 4.768  |
| 666 | 22 | exm-rs9607469  | 37919267  | A | 0.3      | 0.1307  | G | 13.27 | 0.00027   | 2.851   | 0.2944 | 1.601    | 5.076  |
| 667 | 22 | exm1614469     | 43024271  | C | 0.007692 | 0.108   | G | 12.3  | 0.0004519 | 0.06406 | 1.033  | 0.008461 | 0.485  |
| 668 | 22 | exm-rs9627183  | 48284514  | A | 0.007692 | 0.1023  | G | 11.49 | 0.0007015 | 0.06804 | 1.034  | 0.008963 | 0.5166 |
| 669 | 22 | exm1622259     | 50752150  | T | 0.3538   | 0.1552  | C | 16.1  | 6.02E-05  | 2.981   | 0.2784 | 1.728    | 5.145  |
| 670 | 23 | exm2268600     | 80201432  | G | 0.5465   | 0.2963  | A | 13.78 | 0.0002056 | 2.862   | 0.2871 | 1.63     | 5.025  |
| 671 | 23 | exm2273280     | 95738501  | C | 0.4706   | 0.25    | T | 11.43 | 0.0007235 | 2.667   | 0.294  | 1.499    | 4.745  |
| 672 | 23 | exm2273167     | 95794612  | T | 0.4353   | 0.2059  | C | 13.26 | 0.0002711 | 2.973   | 0.3047 | 1.636    | 5.402  |
| 673 | 23 | exm1655810     | 122536945 | A | 0        | 0.1324  | G | 12.39 | 0.0004324 | 0       | inf    | 0        | nan    |
| 674 | 23 | exm-rs5904726  | 146322623 | G | 0.1294   | 0.3529  | A | 13.36 | 0.0002577 | 0.2725  | 0.3696 | 0.1321   | 0.5624 |
| 675 | 23 | exm1666749     | 153762634 | A | 0.03529  | 0.2206  | G | 14.14 | 0.0001698 | 0.1293  | 0.6231 | 0.03811  | 0.4384 |
| 676 | 24 | exm-rs1865680  | 6868118   | A | 0        | 0.375   | G | 19.68 | 9.15E-06  | 0       | inf    | 0        | nan    |
| 677 | 24 | exm-rs2032624  | 15026424  | C | 0        | 0.3421  | A | 16.42 | 5.07E-05  | 0       | inf    | 0        | nan    |
| 678 | 24 | exm-rs2032658  | 15581983  | G | 0        | 0.3421  | A | 17.52 | 2.84E-05  | 0       | inf    | 0        | nan    |

|     |    |               |          |   |         |         |   |       |           |         |        |          |        |
|-----|----|---------------|----------|---|---------|---------|---|-------|-----------|---------|--------|----------|--------|
| 679 | 24 | exm-rs2032631 | 21867787 | A | 0.02273 | 0.375   | G | 16.86 | 4.02E-05  | 0.03876 | 1.063  | 0.004826 | 0.3113 |
| 680 | 25 | exm1667537    | 91133892 | G | 0       | 0.08523 | T | 11.65 | 0.0006418 | 0       | inf    | 0        | nan    |
| 681 | 25 | exm1667541    | 91134179 | T | 0       | 0.08523 | G | 11.65 | 0.0006418 | 0       | inf    | 0        | nan    |
| 682 | 26 | exm2263340    | 8701     | G | 0.125   | 0.4713  | A | 20.17 | 7.09E-06  | 0.1603  | 0.4347 | 0.06837  | 0.3758 |

CHR: Chromosome; SNP: Illumina single nucleotide ID; BP: Base pair position at the respective chromosome as per GRCh37.p13; A1: Minor allele name; F\_A: Frequency of minor allele in cases; F\_U: Frequency of minor allele in controls; A2: Major allele name; CHISQ: Basic allelic test chi-square; P: *p*-value; OR: Odd ratio; SE: Standard error; L95: Lower bound of 95% confidence interval for odds ratio; U95: Upper bound of 95% confidence interval for odds ratio.



**Table S2. The functional annotations of the most significant genes (p<0.0001) based on the DAVID 6.7 and Reactome.**

| ID   | Gene Name                                                           | GAD_DISEASE                                                                                                                                                                                                                                                                                                                                                                                                                                                                                         | UP_SEQ_FEATURE                                                                                                                                                                                                                                                                                                                                                                                                                                            |
|------|---------------------------------------------------------------------|-----------------------------------------------------------------------------------------------------------------------------------------------------------------------------------------------------------------------------------------------------------------------------------------------------------------------------------------------------------------------------------------------------------------------------------------------------------------------------------------------------|-----------------------------------------------------------------------------------------------------------------------------------------------------------------------------------------------------------------------------------------------------------------------------------------------------------------------------------------------------------------------------------------------------------------------------------------------------------|
| CD55 | <i>CD55 molecule (Cromer blood group)(CD55)</i>                     | Birth Weight Leukemia Leukemia, Myeloid, Acute Precursor Cell Lymphoblastic Leukemia-Lymphoma,Breath Tests,Chorioamnionitis Fetal Membranes, Premature Rupture Infection of amniotic sac and membranes,Chorioamnionitis Fetal Membranes, Premature Rupture Infection of amniotic sac and membranes Obstetric Labor, Premature Pre-Eclampsia Premature Birth,Coronary Artery Disease,diabetes, type 1,Down Syndrome ,Lymphoma, Non-Hodgkin,macular degeneration,Meningeal Neoplasms meningioma,null, | chain:Complement decay-accelerating factor,compositionally biased region:Ser/Thr-rich,disulfide bond,domain:Sushi 1,domain:Sushi 2,domain:Sushi 3,domain:Sushi 4,glycosylation site:N-linked (GlcNAc...),helix,lipid moiety-binding region:GPI-anchor amidated serine,modified residue,propeptide:Removed in mature form,sequence conflict,sequence variant,signal peptide,splice variant,strand,turn,                                                    |
| CTR9 | <i>CTR9 homolog, Paf1/RNA polymerase II complex component(CTR9)</i> | Coronary Disease,Osteoporosis,                                                                                                                                                                                                                                                                                                                                                                                                                                                                      | chain:RNA polymerase-associated protein CTR9 homolog,compositionally biased region:Lys-rich,compositionally biased region:Poly-Gly,compositionally biased region:Poly-Lys,compositionally biased region:Ser-rich,modified residue,repeat:TPR 1,repeat:TPR 10,repeat:TPR 11,repeat:TPR 12,repeat:TPR 13,repeat:TPR 14,repeat:TPR 15,repeat:TPR 16,repeat:TPR 2,repeat:TPR 3,repeat:TPR 4,repeat:TPR 5,repeat:TPR 6,repeat:TPR 7,repeat:TPR 8,repeat:TPR 9, |

*H2AF*  
*V* *H2A histone*  
*family member*  
*V(H2AFV)*

chain:Histone H2A.v,cross-link:Glycyl lysine isopeptide  
(Lys-Gly) (interchain with G-Cter in ubiquitin),modified  
residue,sequence variant,

*HCP5* *HLA complex P5*  
*(non-protein*  
*coding)(HCP5)* Acquired Immunodeficiency Syndrome|HIV Infections,Acquired  
Immunodeficiency Syndrome|HIV Seropositivity,AIDS  
progression,Drug Hypersensitivity|HIV Infections|[X]Human  
immunodeficiency virus disease,drug-induced liver injury  
(flucloxacillin),HIV Infections,HIV-1  
control,Hypersensitivity,Lupus Erythematosus, Systemic,

chain:HLA class I histocompatibility antigen protein  
P5,sequence conflict,sequence variant,

|       |                                                  |                                                                                                                                                                                                                                                                                                                                                                                                                                                                                                                                                                                                                                                                                                                                                                                                                                                                                                                                                                                                                                                                                                                                                                                                                                                                                                                                                                                                                                                                                                                                                                                                                                                                                                                                                                                                                                                                                                                                            |                                                                                                                         |
|-------|--------------------------------------------------|--------------------------------------------------------------------------------------------------------------------------------------------------------------------------------------------------------------------------------------------------------------------------------------------------------------------------------------------------------------------------------------------------------------------------------------------------------------------------------------------------------------------------------------------------------------------------------------------------------------------------------------------------------------------------------------------------------------------------------------------------------------------------------------------------------------------------------------------------------------------------------------------------------------------------------------------------------------------------------------------------------------------------------------------------------------------------------------------------------------------------------------------------------------------------------------------------------------------------------------------------------------------------------------------------------------------------------------------------------------------------------------------------------------------------------------------------------------------------------------------------------------------------------------------------------------------------------------------------------------------------------------------------------------------------------------------------------------------------------------------------------------------------------------------------------------------------------------------------------------------------------------------------------------------------------------------|-------------------------------------------------------------------------------------------------------------------------|
|       |                                                  | Abortion, Spontaneous,Addison Disease Addison's disease,Addison Disease Addison's disease Autoimmune Diseases,Adenocarcinoma Adenosquamous carcinoma Carcinoma, Adenosquamous Carcinoma, Squamous Cell Cervical Neoplasm Squamous cell carcinoma Uterine Cervical Neoplasms,Adenocarcinoma Stomach Neoplasms,Arthritis, Juvenile Rheumatoid Chronic Childhood Arthritis,Arthritis, Rheumatoid Rheumatoid Arthritis Rheumatoid spondylitis Spondylitis, Ankylosing,Autoimmune Diseases Diabetes, Gestational Gestational diabetes mellitus ,Autoimmune Diseases Mixed Connective Tissue Disease,Behcet Syndrome,Behcet Syndrome Inflammatory bowel disease, NOS Inflammatory Bowel Diseases,Bile Duct Neoplasms Cholangiocarcinoma Cholangitis, Sclerosing,Breast Cancer,Brucellosis,Carcinoma, Squamous Cell Mouth Neoplasms Squamous cell carcinoma,Carcinoma Nasopharyngeal Neoplasms,Celiac disease,Celiac Disease Diabetes Mellitus, Insulin-Dependent Diabetes Mellitus, Type 1,Cervical Neoplasm Hypersensitivity Uterine Cervical Neoplasms,Cervical Neoplasm Papillomavirus Infections Tumor Virus Infections Uterine Cervical Neoplasms,Cholelithiasis,Chronic ulcerative colitis Colitis, Ulcerative,Chronic ulcerative colitis Colitis, Ulcerative Crohn Disease Crohn's disease Inflammatory bowel disease, NOS Inflammatory Bowel Diseases Peripheral Vascular Diseases,Colorectal Cancer,Diabetes Mellitus, Insulin-Dependent Diabetes Mellitus, Type 1,Diabetes Mellitus, Type 1,Giant Cell Arteritis Temporal Arteritis,Graves Disease Graves' Disease,HIV Infections [X]Human immunodeficiency virus disease,Inflammatory bowel disease, NOS Inflammatory Bowel Diseases,Lupus Erythematosus, Systemic Systemic lupus erythematosus,melanoma Uveal Neoplasms,Multiple Sclerosis,normal variation,Oral Submucous Fibrosis,Psoriasis,Rheumatoid spondylitis Spondylitis, Ankylosing,Type 2 Diabetes  edema   rosiglitazone, |                                                                                                                         |
| MICA  | MHC class I polypeptide-related sequence A(MICA) |                                                                                                                                                                                                                                                                                                                                                                                                                                                                                                                                                                                                                                                                                                                                                                                                                                                                                                                                                                                                                                                                                                                                                                                                                                                                                                                                                                                                                                                                                                                                                                                                                                                                                                                                                                                                                                                                                                                                            |                                                                                                                         |
| ANXA9 | annexin A9(ANXA9)                                | melanoma,                                                                                                                                                                                                                                                                                                                                                                                                                                                                                                                                                                                                                                                                                                                                                                                                                                                                                                                                                                                                                                                                                                                                                                                                                                                                                                                                                                                                                                                                                                                                                                                                                                                                                                                                                                                                                                                                                                                                  | chain:Annexin A9,modified residue,repeat:Annexin 1,repeat:Annexin 2,repeat:Annexin 3,repeat:Annexin 4,sequence variant, |

|                     |                                                                 |                                                                                                                                                                                           |                                                                                                                                                                                                                                                                                                                                                                                                                                                                                                                                                      |
|---------------------|-----------------------------------------------------------------|-------------------------------------------------------------------------------------------------------------------------------------------------------------------------------------------|------------------------------------------------------------------------------------------------------------------------------------------------------------------------------------------------------------------------------------------------------------------------------------------------------------------------------------------------------------------------------------------------------------------------------------------------------------------------------------------------------------------------------------------------------|
| <i>BRD2</i>         | <i>bromodomain<br/>containing<br/>2(BRD2)</i>                   | Abortion, Spontaneous, Alzheimer's disease<br>,Asthma,Azoospermia,Heart Rate,Juvenile Myoclonic<br>Epilepsy,Lupus Erythematosus, Systemic,null,photoparoxysmal<br>response,Triglycerides, | chain:Bromodomain-containing protein 2,compositionally<br>biased region:Arg/Lys-rich (highly basic),compositionally<br>biased region:Glu/Ser-rich,compositionally biased<br>region:Poly-Glu,compositionally biased region:Poly-<br>Lys,compositionally biased region:Poly-<br>Pro,compositionally biased region:Poly-<br>Ser,compositionally biased region:Ser-rich,domain:Bromo<br>1,domain:Bromo 2,domain:ET,helix,modified<br>residue,multigenesis site,sequence variant,short sequence<br>motif:Nuclear localization signal,splice variant,turn, |
| <i>CDC1<br/>4C</i>  | <i>cell division cycle<br/>14C,<br/>pseudogene(CDC<br/>14C)</i> | Calcium,Cholesterol,Glucose,Heart Failure,Parkinson<br>Disease,Platelet Aggregation,Sleep,Triglycerides,                                                                                  |                                                                                                                                                                                                                                                                                                                                                                                                                                                                                                                                                      |
| <i>CCDC<br/>88C</i> | <i>coiled-coil<br/>domain<br/>containing<br/>88C(CCDC88C)</i>   | Body Mass Index,Insulin,Insulin Resistance,Waist<br>Circumference,                                                                                                                        | chain:Protein Daple,modified residue,region of<br>interest:DVL1-binding,sequence conflict,sequence<br>variant,short sequence motif:PDZ-binding,splice variant,                                                                                                                                                                                                                                                                                                                                                                                       |
| <i>DOCK<br/>8</i>   | <i>dedicator of<br/>cytokinesis<br/>8(DOCK8)</i>                | Heart Failure,Platelet Count,Tobacco Use Disorder,                                                                                                                                        | chain:Dedicator of cytokinesis protein 8,domain:DHR-<br>1,domain:DHR-2,modified residue,sequence<br>conflict,sequence variant,splice variant,                                                                                                                                                                                                                                                                                                                                                                                                        |

|                |                                                                                                       |                                                                                                                                                                                                                                                                                                                                                                                                                                                                               |                                                                                                                                                                                                                                                                                                                                                                                                                                 |
|----------------|-------------------------------------------------------------------------------------------------------|-------------------------------------------------------------------------------------------------------------------------------------------------------------------------------------------------------------------------------------------------------------------------------------------------------------------------------------------------------------------------------------------------------------------------------------------------------------------------------|---------------------------------------------------------------------------------------------------------------------------------------------------------------------------------------------------------------------------------------------------------------------------------------------------------------------------------------------------------------------------------------------------------------------------------|
| <i>ITGA11</i>  | <i>integrin subunit alpha 11(ITGA11)</i>                                                              | ADHD   attention-deficit hyperactivity disorder,Attention Deficit Disorder with Hyperactivity,Cell Adhesion Molecules,Coronary Disease,Electrocardiography,lung cancer ,Psychomotor Performance,Survival,Tobacco Use Disorder,                                                                                                                                                                                                                                                | chain:Integrin alpha-11,compositionally biased region:Poly-Arg,compositionally biased region:Poly-Leu,disulfide bond,domain:VWFA,glycosylation site:N-linked (GlcNAc...),mutagenesis site,repeat:FG-GAP 1,repeat:FG-GAP 2,repeat:FG-GAP 3,repeat:FG-GAP 4,repeat:FG-GAP 5,repeat:FG-GAP 6,repeat:FG-GAP 7,sequence variant,signal peptide,topological domain:Cytoplasmic,topological domain:Extracellular,transmembrane region, |
| <i>HLA-DMA</i> | <i>major histocompatibility complex, class II, DM alpha(HLA-DMA)</i>                                  | Acquired Immunodeficiency Syndrome HIV Seropositivity,antiphospholipid syndrome,Arthritis, Rheumatoid,Body Composition,condyloma acuminata,Dermatitis, Contact ,Heart Rate,HIV,lupus erythematosus,Lupus Erythematosus, Systemic,measles,medicamentosa like dermatitis, trichloroethylene-induced,Multiple Sclerosis,multiple sclerosis; IgA nephropathy,normal variation,Psoriasis,rheumatoid arthritis,systemic lupus erythematosus,Type 2 Diabetes  edema   rosiglitazone, | chain:HLA class II histocompatibility antigen, DM alpha chain,disulfide bond,domain:Ig-like C1-type,glycosylation site:N-linked (GlcNAc...),helix,region of interest:Alpha-1,region of interest:Alpha-2,region of interest:Connecting peptide,sequence variant,signal peptide,strand,topological domain:Cytoplasmic,topological domain:Luminal,transmembrane region,turn,                                                       |
| <i>MGAT5B</i>  | <i>mannosyl (alpha-1,6-)-glycoprotein beta-1,6-N-acetylglucosaminyltransferase, isozyme B(MGAT5B)</i> | Hemoglobin A, Glycosylated,Lipoproteins, LDL,Tobacco Use Disorder,Type 2 Diabetes  edema   rosiglitazone,                                                                                                                                                                                                                                                                                                                                                                     | chain:Alpha-1,6-mannosylglycoprotein 6-beta-N-acetylglucosaminyltransferase B,glycosylation site:N-linked (GlcNAc...),sequence variant,splice variant,topological domain:Cytoplasmic,topological domain:Luminal,transmembrane region,                                                                                                                                                                                           |
| <i>MTHFD1L</i> | <i>methylenetetrahydrofolate dehydrogenase (NADP+ dependent) 1-like(MTHFD1L)</i>                      | Acquired Immunodeficiency Syndrome Disease Progression,Alzheimer Disease,Alzheimer's Disease,Alzheimer's disease ,Aorta,Body Mass Index,Body Weight,Cleft Lip Cleft Palate Tooth Abnormalities,Coronary Artery Disease,Coronary Artery Disease Diabetes Mellitus, Type 1 Diabetic Nephropathies,Coronary Artery Disease Myocardial Infarction,Coronary Disease,neural tube defects ,Respiratory Function Tests,Stroke,Tunica Media,Type 2 Diabetes  edema   rosiglitazone,    | chain:Monofunctional C1-tetrahydrofolate synthase, mitochondrial,compositionally biased region:Poly-Gly,modified residue,nucleotide phosphate-binding region:ATP,region of interest:Formyltetrahydrofolate synthetase,region of interest:Methylenetetrahydrofolate dehydrogenase and cyclohydrolase,sequence conflict,sequence variant,splice variant,transit peptide:Mitochondrion,                                            |

|               |                                                                                    |                                                                                                                                                                                                                                                                                                                                                                                                                                                   |                                                                                                                                                                                                                                                                                                                                                                           |
|---------------|------------------------------------------------------------------------------------|---------------------------------------------------------------------------------------------------------------------------------------------------------------------------------------------------------------------------------------------------------------------------------------------------------------------------------------------------------------------------------------------------------------------------------------------------|---------------------------------------------------------------------------------------------------------------------------------------------------------------------------------------------------------------------------------------------------------------------------------------------------------------------------------------------------------------------------|
| <i>MYO9B</i>  | <i>myosin IXB(MYO9B)</i>                                                           | Celiac disease,celiac disease lupus erythematosus rheumatoid arthritis,Celiac Disease ,Celiac Disease Dermatitis Herpetiformis Inflammatory Bowel Diseases,Celiac Disease Down Syndrome,Colitis, Ulcerative Crohn Disease Inflammatory Bowel Diseases,coronary spastic angina,Crohn Disease,Crohn's disease ulcerative colitis,Diabetes Mellitus, Insulin-Dependent Diabetes Mellitus, Type 1,diabetes, type 1 ,Multiple Sclerosis,Schizophrenia, | chain:Myosin-IXb,domain:IQ 1,domain:IQ 2,domain:IQ 3,domain:IQ 4,domain:Myosin head-like,domain:Ras-associating,domain:Rho-GAP,modified residue,nucleotide phosphate-binding region:ATP,region of interest:Actin-binding,region of interest:Neck or regulatory domain,region of interest:Tail,sequence conflict,splice variant,zinc finger region:Phorbol-ester/DAG-type, |
| <i>OR12D2</i> | <i>olfactory receptor family 12 subfamily D member 2 (gene/pseudogene)(OR12D2)</i> | female preferences for male odors,Lipoproteins, VLDL,Lupus Erythematosus, Systemic,                                                                                                                                                                                                                                                                                                                                                               | chain:Olfactory receptor 12D2,disulfide bond,glycosylation site:N-linked (GlcNAc...),sequence variant,topological domain:Cytoplasmic,topological domain:Extracellular,transmembrane region,                                                                                                                                                                               |
| <i>OR5V1</i>  | <i>olfactory receptor family 5 subfamily V member 1(OR5V1)</i>                     | female preferences for male odors,HIV Infections [X]Human immunodeficiency virus disease,Lupus Erythematosus, Systemic,                                                                                                                                                                                                                                                                                                                           | chain:Olfactory receptor 12D3,chain:Olfactory receptor 5V1,disulfide bond,glycosylation site:N-linked (GlcNAc...),sequence conflict,sequence variant,topological domain:Cytoplasmic,topological domain:Extracellular,transmembrane region,                                                                                                                                |
| <i>PFAS</i>   | <i>phosphoribosylformylglycinamidine synthase(PFAS)</i>                            | Tobacco Use Disorder,                                                                                                                                                                                                                                                                                                                                                                                                                             |                                                                                                                                                                                                                                                                                                                                                                           |
| <i>RAET1E</i> | <i>retinoic acid early transcript 1E(RAET1E)</i>                                   | normal variation,                                                                                                                                                                                                                                                                                                                                                                                                                                 | chain:NKG2D ligand 4,compositionally biased region:Poly-Ser,disulfide bond,glycosylation site:N-linked (GlcNAc...),region of interest:MHC class I alpha-1 like,region of interest:MHC class I alpha-2 like,sequence conflict,sequence variant,signal peptide,splice variant,topological domain:Cytoplasmic,topological domain:Extracellular,transmembrane region,         |

|                |                                                  |                                                                                                                                                                                                                             |                                                                                                                                                                                                                                                                                                                                                                                                                                                                                                                                                                                                                                                                                                                                                                   |
|----------------|--------------------------------------------------|-----------------------------------------------------------------------------------------------------------------------------------------------------------------------------------------------------------------------------|-------------------------------------------------------------------------------------------------------------------------------------------------------------------------------------------------------------------------------------------------------------------------------------------------------------------------------------------------------------------------------------------------------------------------------------------------------------------------------------------------------------------------------------------------------------------------------------------------------------------------------------------------------------------------------------------------------------------------------------------------------------------|
| <i>RNF144A</i> | <i>ring finger protein 144A(RNF144A)</i>         | Amyotrophic Lateral Sclerosis,Body Fat Distribution,Cholesterol, LDL,Depressive Disorder, Major,Immunoglobulin E,Iron,longevity,Perphenazine,response to antipsychotic treatment,Schizophrenia,Stroke,Tobacco Use Disorder, | chain:Probable E3 ubiquitin-protein ligase RNF144A,helix,sequence variant,strand,transmembrane region,turn,zinc finger region:IBR-type,zinc finger region:RING-type 1; atypical,zinc finger region:RING-type 2; degenerate,                                                                                                                                                                                                                                                                                                                                                                                                                                                                                                                                       |
| <i>SLC8A3</i>  | <i>solute carrier family 8 member A3(SLC8A3)</i> | Cystic Fibrosis,Iron,Tobacco Use Disorder,                                                                                                                                                                                  | chain:Sodium/calcium exchanger 3,domain:Calx-beta 1,domain:Calx-beta 2,glycosylation site:N-linked (GlcNAc...),region of interest:Calmodulin-binding,repeat:Alpha-1,repeat:Alpha-2,sequence variant,signal peptide,splice variant,topological domain:Cytoplasmic,topological domain:Extracellular,transmembrane region,                                                                                                                                                                                                                                                                                                                                                                                                                                           |
| <i>SFTA2</i>   | <i>surfactant associated 2(SFTA2)</i>            | Behcet Syndrome,Lupus Erythematosus, Systemic,                                                                                                                                                                              | chain:Surfactant-associated protein 2,glycosylation site:N-linked (GlcNAc...),sequence variant,signal peptide,                                                                                                                                                                                                                                                                                                                                                                                                                                                                                                                                                                                                                                                    |
| <i>ZNF600</i>  | <i>zinc finger protein 600(ZNF600)</i>           | Phospholipids,                                                                                                                                                                                                              | chain:Zinc finger protein 600,modified residue,sequence conflict,sequence variant,zinc finger region:C2H2-type 10,zinc finger region:C2H2-type 11; degenerate,zinc finger region:C2H2-type 12,zinc finger region:C2H2-type 13,zinc finger region:C2H2-type 14,zinc finger region:C2H2-type 15,zinc finger region:C2H2-type 16,zinc finger region:C2H2-type 17,zinc finger region:C2H2-type 18,zinc finger region:C2H2-type 19,zinc finger region:C2H2-type 1; degenerate,zinc finger region:C2H2-type 2,zinc finger region:C2H2-type 20,zinc finger region:C2H2-type 3,zinc finger region:C2H2-type 4,zinc finger region:C2H2-type 5,zinc finger region:C2H2-type 6,zinc finger region:C2H2-type 7,zinc finger region:C2H2-type 8,zinc finger region:C2H2-type 9, |

|             |                                                                             |                                                                                                                                                                                                                                                                                                                                                                                                                                              |
|-------------|-----------------------------------------------------------------------------|----------------------------------------------------------------------------------------------------------------------------------------------------------------------------------------------------------------------------------------------------------------------------------------------------------------------------------------------------------------------------------------------------------------------------------------------|
| ZKSC<br>AN8 | <p><i>zinc finger with<br/>KRAB and SCAN<br/>domains<br/>8(ZKSCAN8)</i></p> | <p>chain:Zinc finger protein<br/>192,domain:KRAB,domain:SCAN box,modified<br/>residue,sequence conflict,sequence variant,zinc finger<br/>region:C2H2-type 1,zinc finger region:C2H2-type 2,zinc<br/>finger region:C2H2-type 3,zinc finger region:C2H2-type<br/>4,zinc finger region:C2H2-type 5,zinc finger<br/>region:C2H2-type 6,zinc finger region:C2H2-type 7,zinc<br/>finger region:C2H2-type 8,zinc finger region:C2H2-type<br/>9,</p> |
|-------------|-----------------------------------------------------------------------------|----------------------------------------------------------------------------------------------------------------------------------------------------------------------------------------------------------------------------------------------------------------------------------------------------------------------------------------------------------------------------------------------------------------------------------------------|

---
